# Supplementary material
Source: publisher figshare collection journal article supplement (https://plos.figshare.com/articles/dataset/_/1172034)
Supplement: Supplementary file 1 [file 1]

Archive with 7 entries (7 files):
- Figure S1.TIFF
- Figure S2.TIFF
- Figure S3.TIFF
- Figure S4.TIFF
- Figure S5.TIFF
- Data S1.TSV
- Text S1.PDF
