# Supplementary material
Source: publisher figshare collection journal article supplement (https://plos.figshare.com/articles/dataset/_/1172034)
Supplement: Supplementary file 1 [file 1 › Data S1.TSV]

spVL	CD4.decline
4.25785207234196	-0.155381076114853
4.06321193881836	-0.0587581574945185
5.54790269449937	0.0166744829209524
4.26761730311285	-0.129489315624442
4.45680620565418	-0.0862645392321804
3.62942593433871	-0.781149280716919
4.80581665958346	-0.525809614863161
3.89002289468358	-0.17671653918164
4.15789167866443	-0.109515433359824
3.59777359474638	-0.0334073322417121
4.17008897617802	-0.0706177839385216
4.95450931745597	-0.165094145276256
4.24728578352015	-0.147974398236604
4.05043489098216	-0.0109701045516753
3.73113526999412	-0.192748973202299
2.90409738410949	-0.187968736644367
4.63576930670766	-0.126428498690446
4.60672015216928	-0.0395822119684872
4.56104565401468	-0.0238316686470101
0.846117764418247	0.00109664250448336
3.78058756451712	-0.170817099955534
4.09879411146604	-0.0536895582152937
0.864710982682637	-0.0239336481708222
3.68290305068968	-0.00404502297097392
4.23089766049666	-0.0500314031322077
4.49126149570563	-0.0935849186626099
4.17471214732049	-0.273633109688678
4.86428142122904	-0.171306752589075
4.67705945082618	-0.125728585310308
4.09546526696199	-0.0656550518474564
4.94647266387356	-0.409377281317239
4.50123059944368	-0.193626489034596
3.66265856344014	-0.0432421020370746
3.64071895697128	-0.117788861153586
5.03698818180565	-0.121341354666984
3.79572286412726	-0.118630982585903
5.15312864279278	-0.135264166181079
4.77206879935968	-0.052203590685809
6.27599570793905	-0.159193828530521
4.40603254262667	-0.129329126585445
2.23450405794322	-0.239930846161672
4.00693661751735	-0.138663405787805
4.89432209031971	0.0413670352939574
4.28998721698197	-0.255641032252646
4.77640615107029	-0.0299754562314973
4.14101812929192	-0.12642662297663
3.38919707636421	-0.123397025942203
4.96264833580667	-0.108411437527772
3.80276026171873	-0.0804009344029811
3.97255010675122	-0.0510701769060073
4.07774172728174	-0.102290526919158
3.83490437632663	-0.141148164403481
5.39991950629275	-0.104903087465624
5.12638767463798	-0.0789396040759326
3.59443775031555	-0.0636003010541351
2.83758843823551	-0.0942618352763885
4.19462609821269	-0.0380461997313575
4.63415848708411	-0.122039827599251
3.79698458980151	-0.042042239314247
4.49778490550725	-0.151904413569195
4.45934168032286	0.0771974747962766
4.46028683743329	-0.0915389344798894
4.95558556705179	-0.101779968436426
5.24750621534902	-0.314290603653581
5.0933499861279	-0.198100566640791
4.13441341495864	-0.234070501145302
3.5273196570811	-0.0403418681737847
2.80679407259275	-0.0589262021813345
3.49641146770045	-0.187836517370351
1.80030130679788	-0.0466809617238737
4.83856411343713	-0.0541583838743498
4.35101370316207	-0.0876250818229237
5.09478437070402	-0.461512258116999
4.53360164282231	-0.0877283467294818
5.0942499545124	-0.0637499582209518
4.55729976467632	-0.229884096068219
4.65495928120193	-0.0594905363494057
4.44189065134738	-0.0777629119577319
4.74588344951443	-0.166634353502951
2.77572499898644	-0.156037385588928
2.17466994919675	-0.110820381860979
5.09810111623668	-0.0660159800519663
3.97226070188261	-0.08674268287375
4.84496567962128	-0.0999951403625596
3.07424585308082	-0.0877792042404259
5.62092972009668	-0.116424026744311
4.21369810014815	-0.0863756496028379
5.67357616825732	-0.216181337593552
3.73598782541503	-0.146003604542794
1.72835378202123	-0.251854527719458
3.76618861619358	-0.0930352986128917
4.62333544284535	-0.156137275939903
2.1179731483539	-0.0609665179306197
5.00598674416339	-0.116049142073182
3.23350376034113	-0.0475480587589525
2.06017178121901	-0.0784754008540138
3.2951438125789	-0.389953777086388
2.17364761340506	-0.196042434336584
4.88777898527951	-0.109394436315933
4.66073892225335	-0.0728527965168008
4.30852059288855	-0.0651671622331425
4.58582950207968	-0.0702841920851891
5.01902306072514	-0.0572517954496475
5.0076305420669	-0.160799646033632
5.0650001896924	-0.176572746815151
3.57858596225907	-0.113574816950711
4.57224814041142	-0.183192512234757
4.71764504128579	-0.0318948428265834
2.15675741461056	-0.100848659276398
4.41228010480668	-0.105426920966778
4.38689907149575	-0.106546347724863
4.36389786043904	-0.0805020757132291
4.68703489030778	-0.0610282418904089
5.27017906949142	-0.218261658525217
3.19366465283891	-0.145613918141004
4.09923957047243	-0.307529190048005
2.5962500970884	-0.12385865669324
3.6652043036952	-0.220255189467327
3.89690770065085	-0.0570222568021799
3.77707855184912	-0.0588708549890452
4.75095388959194	-0.0988560548632844
3.38333348454676	-0.122472434731668
4.8115523714451	-0.0671123981368596
4.51069802837099	-0.323126341320768
4.51343224589853	-0.138370433581221
4.01158013984525	-0.267349578177645
3.85292501675107	-0.45068935954551
1.04174200398128	0.0465835926942866
4.11926853588381	-0.247114607569736
4.3222575184484	-0.146137066041965
3.93305922864241	-0.0931389974460767
3.44617325448731	-0.09520552108969
2.37673985803961	-0.129096101892419
3.33548750170392	-0.128457574520852
3.6891622252347	-0.530178212712628
4.58454899775739	-0.0842660160704241
4.58865129364177	-0.205609969193668
4.62229750818769	-0.151875512036224
4.6661516060871	-0.0334585541118392
4.5314486009138	-0.0873033591259302
4.74879789516682	-0.11865838881087
5.47904531573681	-0.0242481291651287
4.8476263896657	-0.102265321730926
4.67034625888669	-0.114684049527731
4.58156552070886	-0.0310811463583724
4.6460465938085	-0.0353588457103036
4.5251855066151	0.000277316042657847
4.42130802050412	-0.340774520607297
3.93919849446189	-0.0630082057368349
4.96302975787473	-0.139693119854382
5.06392221830127	-0.197104870828081
5.32534213570786	-0.165179546115817
5.01346533322828	-0.0998743280939932
0.766476584287909	0.0274706765182638
4.06101185591668	-0.166484865012271
4.01715810288408	-0.141009618953193
4.38645468445232	-0.133643426829404
3.40019688077615	-0.247524910924121
5.51694249428918	-0.388142292950051
3.59336657225485	-0.0844154923922134
3.55170080707163	-0.0668457194565652
4.57470167497797	-0.0697951407572973
4.21050417548643	-0.093566724500596
1.88848504031996	-0.0566686112641945
3.66319820787861	-0.0954559830765586
4.67729549873056	-0.0587989703524739
3.83422067538226	-0.109685557162309
3.86495026173672	-0.208371504122875
3.94471164397004	-0.165052554246316
3.82410752592676	-0.130088404487424
3.38853338841012	-0.0544420618107009
2.80698626243228	-0.216558618117062
4.82046765134336	-0.416484163021113
3.91315598969444	-0.329541811743549
4.43719651058711	-0.225773192184685
3.96016878652679	-0.0612636061648647
3.72810783719932	-0.329358347556221
4.10643624604153	-0.0779195112083825
4.51693204453562	-0.0690379116637027
3.33418326571964	-0.206301352708315
3.19572364097573	-0.182002113707231
2.7144518291708	-0.111395695142289
4.07417019750914	-0.0443584958227291
3.85831099244114	-0.347331508113771
4.02782036390413	-0.33917257722627
2.49849613433863	-0.111111441817289
4.881626883476	-0.108010988078466
5.06349267547876	-0.147672670519947
4.15783070198323	-0.18987099076848
3.91168765415763	-0.318013433942037
3.37454055957154	-0.132766155784142
4.4081816345632	-0.168884758055356
4.526853654936	-0.311276506923779
5.18130215069602	-0.477736462290277
5.06156960291318	-0.174254696610263
4.45210682127083	-0.448780011794704
3.98888100218324	-0.0926384233933935
4.38516224605475	-0.354731832101289
4.80464343244724	-0.27004130489758
4.00999303430438	-0.227473221057917
4.06355421413683	-0.186334958783829
3.22347631176312	-0.0476349100599599
4.13621852643417	-0.470777209314998
1.57978359661681	-0.395086064761255
3.50513057552708	-0.0830966748676901
3.82699993754744	-0.0948652939871658
3.87811061760866	-0.0414789156425119
2.35426917772405	-0.186075483223313
4.46788501471489	-0.240497319200695
4.4067337568996	-0.0719328946811554
3.89251217265096	-0.203002676957552
4.66274203401323	-0.14243457743242
4.52871712932227	-0.179965526205882
3.975410092828	-0.133083408498984
2.73084004238485	-0.234524199062326
2.88590520246407	-0.0475642098523422
4.71594073999179	-0.0242758397250748
4.84606550861485	-0.146447758601437
4.61870654853636	-0.512974369365543
4.64881179602879	-0.0862619710955103
4.01381456404719	-0.035518756770213
3.62778579871057	0.11715700545014
4.90198103452251	-0.329591836734694
5.35455811950163	-0.145517230371423
3.70971127642011	-0.0726130460661592
3.62878955030432	-0.107313640471873
3.98030601222902	-0.0525840936209618
4.40247265597368	-0.434195537866697
5.30165735022106	-0.530710866704996
5.25254210243445	-0.0444871899811737
5.11686414082682	-0.108080909731307
2.51195738560401	-0.0600788762057622
4.83867985885362	-0.127140301558906
4.22911355711852	-0.652479464357905
4.77415599048484	-0.202836317386007
3.23236182965905	0.0529602348663494
4.46573766388238	-0.224778407934046
3.74517983654898	-0.0559108458245251
4.89206390580896	-0.262810770145733
3.8468503177537	0.0109941801951604
4.10277279483101	0.0936919418701013
3.83851176984711	0.199201042390007
3.86218955213036	-0.0846701354957691
4.47706732119139	-0.146854264284583
3.38257951074112	-0.315499476150628
4.75670348220778	-0.519636679880792
4.32599255270606	-0.0202867360825387
3.14145934561293	-0.320118047071637
4.34041995426195	-0.413022113229151
4.363334981448	-0.909539650177043
3.94217379944274	0.0525048500942501
3.82988366757159	-0.221087785602666
4.21892546819447	-0.212455288057088
4.74288400656239	0.232741837679116
1.89208638565164	-0.00706227651447638
4.16217599258312	-0.0738601191858675
4.2011485280462	-0.139009603105611
4.54082795535032	-0.197776450312962
4.61461255317192	-0.252454683247652
3.55231973149681	-0.00736474463662025
5.67368122930937	-0.199002161564369
4.56879970419239	-0.194416682137266
4.44809653535921	-0.221277794496646
3.74427499121294	-0.491244330169902
3.63871947611726	-0.392458227931039
3.55146207417605	-0.415559032340401
4.86953728884086	-0.237472080712004
4.02054359592298	-0.263266822330714
3.72054521376448	-0.0520085639951033
4.22548328215846	0.1463700234192
3.48346462369331	-0.139278822641374
4.89225354441422	-0.426820296479002
4.18250960768815	-0.0418248955767674
3.22314724473764	-0.0342985184153866
4.70505775764677	0.239659837649787
4.07089610168141	-0.260793881106856
4.47283404733152	-0.221114481500409
4.42601071654789	-0.05111015253364
2.33008441456759	-0.0784016261796092
4.92244318512824	-0.727786219826721
4.06474157206202	-0.0986430537168
2.78270482523311	-0.0055259040033581
4.25717470713042	-0.26783215979087
4.69524672327845	-0.659553144513151
3.82952979720059	-0.0448572584930384
3.64375852826754	-0.0420391106234258
1.80272380033138	0.0925467410022035
3.71416120571965	-0.145837290594407
5.01937342809021	-0.310467344117572
3.28991465470977	0.223570569585656
3.18310405849249	0.805398557785994
5.05212161453962	-0.583077715884274
4.52079832935371	-0.0908593950958134
3.37068365219714	-0.0713506223715664
3.59527267539764	-0.0279114414197887
4.34325193616114	-0.363281327701782
4.72271300800188	-0.454433522394684
4.54358684887014	-0.0960537081761028
4.43482242513909	-0.369957027418875
1.04185210434224	0.0524490164726173
4.56580974285673	-0.170089632295856
3.96993736994064	0.0714913752212592
4.40846231733645	-0.166230803571963
4.00472101714017	-0.0673489452591021
4.24406359024498	-0.178882804362963
3.66101858232964	-0.0181314162509565
4.66091179567121	-0.244953091309975
5.47591859778881	-0.284154709918901
1.11394335230684	-0.412858984159223
4.38554561363505	-0.0824388808037171
4.78606102177823	-0.249280087991651
4.55910038766834	-1.64757171792817
2.77505860837286	0.163384461025631
4.11482847538431	-0.0306799140029719
4.33600483461457	-0.151450053705693
4.72651937767628	-0.0418996129214026
4.17140278404203	-0.226243767234347
4.40090504599727	-0.0784687854554021
4.28172944871132	-0.148836812199053
3.46481841524194	-0.788822474596531
3.13817424796222	-0.121794316101688
4.39474163584147	-0.0607854859259378
4.56970939171067	-0.105042823331008
4.46981388575818	-0.0418639107243483
4.26345791597496	-0.0896592780328851
4.74641505527654	-0.0976471578002741
4.89311866954924	-0.127892022390116
3.94126163676671	-0.0303144635355347
3.7857314271134	-0.104990093978444
4.06410953588589	-0.222762981645287
5.22148467301501	-0.170967301755164
2.27493339724221	0.0740786646856189
4.02726842576086	-0.213953607883712
4.62942143320653	-0.109566161004105
3.38983300210853	-0.160012547858635
2.67364083850057	0.106850469864369
2.7651024930664	-0.125106755264857
4.80222841495298	-0.27156832736394
4.98764267851	-0.0501299401366506
4.63546664562558	-0.0887094051883607
3.9228564456153	0.0442464519995418
3.96137166557029	-0.0198712930050602
3.72726877308827	-0.846878721103699
2.44653990212741	-0.0561881377455101
5.081581458235	-0.524617996604414
2.48267322828143	0.231564759321698
3.13252728769707	-0.0508708584843581
3.36603754202489	-0.421324038756845
1.88117548016184	-0.12905037199437
2.54055745199293	-0.264020400698989
1.53265940845029	-0.12955415603864
3.23647230710545	-0.0945895030732701
4.23959841077748	-0.0351352872389596
3.68389490191138	-1.43017793247815
1.04331003962653	0.00843476324007725
4.71769816970991	-0.426859821774945
4.80739607308947	-0.153395145895827
4.50253585200485	-0.355542818655066
3.37363440495526	-0.0121640089878365
5.06050582079118	-0.559879615006402
4.89964621867159	-0.0886767118789196
3.59904667563228	-0.0573183652284217
4.72385976769823	-0.329070005073162
4.41382425138226	-0.131060294879686
4.52859959592806	-0.132223189514683
4.1096088073054	-0.0683701492056173
4.09651554680651	0.0786013331368585
4.35097528520864	-0.0497090253052935
2.83505453660204	-0.0391362848401055
2.4887726028102	-0.0301712181960307
3.86580106428032	-0.0472251197761706
4.69718005989771	-0.378668938399826
3.96169746945964	-0.0267596594845106
4.4457605465043	-0.0467104711403429
2.72969084919482	-0.00793566557475578
3.62475114282713	-0.113325699862263
4.63110873901131	-0.238412459523814
5.03160840467772	-0.59375492299602
3.36664479225737	-0.0521102500960111
4.74415419624305	-0.0993748544844889
4.14908998312128	-0.645202979675277
4.25404068724298	-0.442550765857379
5.17861204277534	-0.430331956119105
4.2169047590224	-0.959022186324739
3.98854425996541	-0.216578519148857
3.44786890573492	-0.0859819307909356
2.98479618841703	0.0192373757924347
2.71344740391191	-0.405576645457946
4.70444336232257	-0.0807534128703925
4.80384082853731	-0.137917782015973
4.98703597140651	-0.283647548079063
4.16530436387477	0.0331182063793706
4.48527364624357	-0.121895233700206
4.71978560738237	-0.3665791966471
5.21756777236731	-0.249090099505304
4.14999249499437	-0.0578876268227676
4.27481917901614	-0.046801529975169
4.73209210295231	-0.183870915112655
4.31084091686816	0.387125000354543
4.74677366823475	-0.327009191680098
4.35728065750154	-0.0555577048738624
4.18080817917531	-0.376454955604541
4.36519575595685	0.154565617454019
4.28390134657557	-0.0394236343590475
4.52206332327974	-0.0569864865873418
4.21824164947131	-0.242182620832393
4.55310944264401	-0.115516034340753
4.20125274760682	-0.242299918837346
4.96369827913091	-0.0486486981912503
2.46051907110174	-0.0820391784702352
5.80109157278186	-0.0623857588001132
3.7480665388237	-0.152191783833746
4.95526550468824	-0.134250994585304
4.59132354509172	-0.212095773414116
3.25931714081403	0.256049960967993
1.14759774197992	0.239549549041396
4.79494287595443	-0.033459216233731
4.28260448571727	0.185982582812851
3.29293514844527	-0.13323476588743
0.998908798649388	0.34121776716789
3.70865790012834	-0.198058194822317
4.36878506981824	-0.120497547314245
2.55624301696043	-0.152476262091718
3.96645405876904	-0.188520199788983
3.14528780706506	-0.293346161443729
4.9935759655115	-0.217967401224888
4.5129659087747	0.0890163445280642
4.44177668026426	-0.103120725034199
4.60722948206089	-0.265893888692888
5.434794167875	-0.445137981518507
4.28654803437162	-0.0473859434861896
5.76474126083327	-0.100241400120699
3.98894102587315	-0.0348374514575425
5.11821509893183	-0.0448227510725074
4.35453326287515	-0.120958801729849
2.32153008473176	-0.105571746905141
5.39424585496718	-0.292048450526082
4.17539337915339	-0.169389522201905
4.21126372770919	-0.888751194986362
2.72604043670717	0.451944031535975
3.05455631634713	-0.042728492637188
3.75937538909351	-0.116793264545002
4.1097494395239	-0.125375222384191
1.84388237485007	0.161915982761081
2.54248676163016	0.495809044633949
3.33942683620128	0.359672990607442
5.10103066968154	-0.220189673151904
4.74844346524323	-0.178427378450101
4.69483409688442	-0.244722407259562
3.58221356880889	-0.251932334013345
4.14045862470551	-0.00880146304413542
5.08913188223363	-0.58195305355146
5.08689896518523	-0.324470376599054
4.87689953420525	-0.466450527792
4.97923895185194	-0.386332460576237
4.75921101904366	-0.577769690311064
2.3547115808965	0.125789149040797
5.08504730898048	-0.454845059271154
4.15446360043468	-0.163655037777634
4.00335570623868	-0.217716899376997
4.05967478764387	-0.10238583406529
4.38585082595696	-0.0654678985835916
4.34992248175699	-0.315635663367004
4.23228322799717	-0.11477947583351
2.8284767298547	-0.0648872548406266
3.51612802053217	-0.0164611516820288
4.07633423950947	-0.140033993388254
5.51038986499851	-0.109460724591215
4.82589970381152	-0.539474701683333
3.96878709626835	-0.0324295429989588
3.84796973447845	0.0956727627128361
4.01571172088504	-0.0383285208292255
4.23350758036189	-0.128652593537257
3.80670361507631	-0.0554667922692819
0.896701873618601	0.11588509724924
4.90264525307368	-0.0833279896605704
4.66444145157694	-0.934522074304406
5.25156329697954	-0.579329239749973
4.47290982126957	-0.347935044893744
0.924691032748213	-0.0685406554541521
4.86722521925675	-0.494599499305807
5.40633510804855	-0.618678815489745
4.42398955413478	-0.0451573370722277
3.77009957900616	-0.0894140412537894
4.55452931273547	-0.123389781689723
3.55360099253697	-0.017474764033428
4.24519598679995	-0.10025332657688
4.60385572129644	-0.528021390619168
4.67472349910333	-0.465065712251536
4.12964208856515	0.177088869227297
3.81678807576663	0.150085137436145
4.44280731319578	-0.289498460520624
4.36675282846895	-0.343457662504511
4.60130949996773	-0.11575703292512
4.56793186702524	-0.182322884033763
4.27307600179779	-0.0832176725854067
3.95403890124319	-0.0414141923130223
4.61723118472353	-0.70034863614204
4.71402034136269	-0.227684202715736
3.19691530308599	-0.0176728922058809
5.18918146193069	-0.109828927376249
4.92585776327199	-0.234524997016045
3.48226985709955	-0.177734893417087
5.25172000566715	-0.35768603621432
4.11044493754611	-0.0261578194346354
2.85846722096531	0.226182005699358
3.33812166090166	-0.174165996822417
3.4291576732486	-0.625151356968275
3.59579304905667	-0.232856145287951
4.67333006806329	-0.105118044757394
4.33862200614905	-0.0893140839098121
4.35076221813378	-0.32244545358379
3.28076048133464	-0.110481061459033
3.86739991479442	-0.0913457614135102
2.92101274618948	-0.350993116357031
3.51830721716352	-0.120145060114073
5.1936825473208	-0.307422258411457
4.83252048428075	-0.201620330221736
4.89809386148222	-0.132275074124549
3.18012633821079	0.0508628615511434
3.26880475271533	0.0515650939724358
4.2132259006174	-0.172889618544871
2.9654352398171	-0.0616485235643052
3.44466690445814	-0.0694247598157439
2.84548668556632	-0.0175142562740003
4.44627104828007	-0.229055822102067
4.49723148132582	-0.026315602925055
4.85357357253754	-0.0881044418603916
4.38372316181502	-0.279646782271096
4.56078128725037	-0.0230796413269135
5.11910320755065	-0.195053351135641
3.75041829816063	-0.397467090149256
4.2557014384608	-0.425317693547341
2.80660503339113	-1.59855775784509
4.71911458489738	-0.0523201428952366
5.00507278833638	0.909218312052313
4.71523832590119	-0.218971245274373
3.82370553185451	-0.210198189190485
4.71265306956043	-0.369942748091605
4.3738976649322	-0.274094092930254
4.00155113749273	-0.473343433354261
4.62794625523221	-0.277676199220615
3.9428948393415	0.186895629211777
4.94397561750852	-0.219047764002543
4.35929877582363	-0.194738372526506
4.59129720933913	0.260313268372645
2.9156726875358	-0.463876023211081
4.96515780781504	-0.215385458219877
4.85414398068872	-0.239504277742644
4.5671144802681	-0.647714335756184
3.61896599488575	0.363416744789787
4.24071067030031	-0.0253149375003811
4.44853313872106	-0.0825005671902998
4.13559519523682	-0.0424067832737342
4.48342618193283	-0.0326010707936533
4.19528383430978	-0.0941030468219714
4.38492106024254	-0.30821942907398
5.14710076223106	0.0175216156417206
4.71533532341225	-0.153409824052932
4.58052094698708	-0.307769929364278
3.38366927795307	-0.0397177811064384
1.82106210246432	-0.0253557491870944
4.68156200780479	0.144302775194557
4.1543216493898	-0.165656318825052
4.39244453188077	-0.228911239892029
3.97168914780603	-0.0921185079421739
4.33586016231631	-0.127143221433137
4.61782733847847	-0.395278114417096
3.81711986813682	1.3849745070336
3.60152259106193	0.0243606025045417
3.53602861319018	-0.209056810363323
3.67183665776666	-0.385490414024499
4.36727192866391	-0.454224116016415
2.82154618895657	-0.0127211895705538
3.88293381475288	-0.360981379583964
4.89625949074272	-0.398773283607481
4.34977193963342	-0.303397830794044
3.74221133934222	0.0806062300436563
4.57969252197043	-0.112336457361423
3.2598847336586	0.117175258691571
5.11101748715638	0.199608610567513
5.39436434645156	-0.388559156537905
4.61951648199125	-0.312261453149108
3.31306087579802	-0.188485639371321
4.13068389010261	-0.305299801889886
4.33842750870306	-0.0556531938696899
3.28191215165196	-0.534397293766944
4.1654248573525	-0.926818310591679
3.63966688230604	-0.0077329777808561
4.6970492547577	-0.341568337534271
4.23882983812092	-0.310596154689029
3.6063376607391	0.0220141056084893
3.24811541439924	0.049049088229877
5.05969345923369	-0.20413161198886
3.7373141623266	-0.214087684601542
4.20094872868681	-0.0102950787296584
4.306066668851	-1.08403684421305
3.85871887092581	-0.288632536472514
5.35511687282866	-0.72100569939426
4.98334676361984	0.00250656515492047
3.3780715371369	-0.0977863468625687
5.23917832975774	-0.248690787797472
1.5062854874063	0.268096597405467
3.95677942515143	-0.23583913051627
4.38290296483699	-0.115041348993097
4.50152623097789	-0.179468096049402
2.76797341293487	-0.152699750826459
3.83781830535888	-0.120382473754085
5.09321794940646	-0.574514910455065
4.69335206761468	-0.068187355912506
3.17961941285572	-0.253034871525957
3.08937190883504	-0.265901146120552
3.45810355873313	-1.04735154282027
4.5804224888719	-0.0965865855485271
3.29878357485103	0.00503874096839082
4.57349247799721	-0.735248685114565
3.28148318799807	-0.00872542843759491
4.37864981559322	-0.147888259124467
4.14390873711033	-0.259916062711801
4.5673940990793	-0.0553349705079057
5.064764329502	-0.247449620583949
4.86628370228436	-0.652893215334191
4.7381939818565	-0.265468561133031
3.96881507959164	-0.312491852886406
4.66770237877858	-0.0614243491417091
3.89997223437088	-0.176884996029156
3.90618133302282	-0.0988449979927464
3.59980909729877	-0.232171404022588
4.60645535219101	-0.516091436823254
4.70434160487607	-0.283295941260453
3.55521768782156	-0.2756582128695
4.38937612408249	-0.23128485598062
3.94287109640952	-0.347211848538295
3.72645231468765	-0.20170709538986
5.05464778503594	-0.0982710388851403
5.16325569411322	-0.0769099474875992
4.03384566912068	-0.0523270347132364
4.49116894308912	0.0844170273379714
5.10506313693283	-0.289457784113297
3.12587070677945	-0.220745626495672
4.72676021215182	-0.0828705447617778
3.89575220553683	-0.359477230786437
4.58173502440536	-1.35105006140348
2.71178236852868	-0.0479637616846433
4.61587998479868	-0.144638813924619
4.1215780028802	-0.411985599700101
4.73211977154204	-0.159452717785666
4.48521435543333	-0.10117182702935
4.13078178108658	-0.0861267370583948
2.09620830592128	-0.185758373336294
4.73757137153426	-0.386354594434217
3.81676599286792	-0.254291048704649
5.05628085642709	-0.0626194707266702
4.21727218175553	-0.207063635898579
3.75308475224891	-0.317862200200863
4.23380087745162	-0.163052436310863
4.73113742961256	-0.52709729604807
4.52308364738026	-0.366947068612922
2.98765250824599	-0.157379525281855
3.61206811182595	-0.263849581241462
1.65582206812502	0.197996532074525
4.61684832929067	-0.315942166841054
4.54986027336821	-0.297447963402753
3.70875912864833	-0.150421410035351
3.42771277845575	0.0374436374650649
4.54471882521583	-1.21606874783479
4.55978649639014	-0.281827858518248
3.40806546239402	-0.252516223958148
5.1797909586476	-0.303484401902705
4.92182163666304	0.198410788288118
3.13884144905017	-0.254358920376448
4.36286537356363	-0.338410700461622
4.46499355122056	-0.182192376126405
4.43804951995689	-0.216366657717939
4.88718233732832	-0.150343056614372
3.18636473416792	-0.204894392317662
5.54597217165772	-0.366149612209156
5.17472078604519	1.06513157894736
4.01133429810639	0.0949926231402314
4.2299490758128	-0.544425282775513
3.20309118940221	-0.0475728927608329
2.5236025462462	-0.440352108315608
4.77989627683568	0.0403632956804945
4.28049266314489	-0.358304272671507
3.59566269636187	-0.0796823901672177
4.80356864410171	-0.314308297706527
4.29984715434134	-0.314138129752215
2.50595652336598	-0.257197214563078
5.17037276378983	-0.589606387251803
4.27862709947819	-0.0280906749925015
4.329576083882	-0.0811116364621781
3.74367768427127	-0.16250903298079
4.41756608677455	0.0307732075030584
5.12174659388478	0.0300459064345195
3.13950746883752	-0.0471676385463692
3.68819423253053	0.265908835445388
3.38011428205435	-0.1335110055466
3.4399994200615	0.128471388085608
4.65313394465747	-0.265086732185301
4.58019883260785	-0.104222855986793
3.19915800435967	-0.0439674891693968
4.84805104940609	-0.261722962537458
3.35505617978964	-0.137858760491799
4.81708716479752	-0.597658431508121
4.92031053279994	-0.745306950786403
5.01672495111077	0.117508351346041
4.81918310110769	-0.288123357671706
4.05104182088033	-0.719701435748325
3.14652946620257	-0.881573503628537
4.65868851132207	-0.12494406872666
4.3131481794233	-0.106147459768312
4.28611352104931	-0.318332882415564
4.92336691494891	-0.0935636101818056
4.60905378080996	-0.353186590337775
4.57453329692397	-0.34891108464989
3.8457895479747	-0.165674750921921
3.65333403392125	-0.544555030844135
5.2366266659915	0.212797767367688
3.45499739411082	-0.1093816872687
4.92197637913758	-0.346841622342874
4.1201969823634	-0.0216487951045037
4.83462492615345	-0.161570525151104
4.84229779563432	-0.202001626232076
4.32490965773556	0.025259555048488
4.28974418333287	-0.297884300852742
3.80182469921218	-0.353385004218897
5.19528121902562	-0.268209178800393
4.19176368440387	0.0988474967218037
5.256969124594	-0.0303529069121314
4.65027201180335	-0.231535544297463
5.35888084842282	-0.478681900639134
5.01753998657721	-0.326476788298698
3.51341456252568	-0.0336282841040272
5.22245780063087	-0.389034358959142
5.40952501342985	-0.390916903107639
5.0071252540225	-0.135300798553908
4.59807890012511	-0.0807179830998846
3.15564178610625	-0.07359631031919
3.43669906942659	-0.264796200059459
4.86070896133736	-0.173143478445137
3.20891095905389	-0.0577527706715983
2.06309397355556	-0.762370698861845
4.51858703863346	-0.0162419399956392
2.73898397342057	-0.109810409972512
4.99718758165548	-0.343356268429987
3.41967214646864	-0.21048893818777
4.13894205866768	-0.0190162032927363
3.72336325317545	-0.159037451800075
5.51043085997075	0.082823784153138
3.10158478710112	0.111984227619664
5.27405930360464	-0.138978805151086
4.6558805355169	-0.0407019417257139
4.47238721457873	-0.282604671951861
5.04358483797498	-0.260405175444629
4.9341960876661	-0.777848609205935
4.15353185655453	-0.1631759768303
4.94154572760493	-0.28475702701055
4.29082833786284	-0.192559949861587
4.18922462927493	-0.104462340541424
5.1555646272719	-0.246563600484467
5.31207328099205	-0.199297596269253
4.1032109034168	-0.335690979275968
4.73116365942563	-0.251286754506498
4.73414531303985	-0.121353016807547
3.77293431003563	0.00589717121795721
4.18093577864651	-0.263256719736739
5.18777341090404	-0.269684793129567
4.55240425078466	-0.148556905392451
3.81572869170877	-0.193366494465291
4.33495726051709	-0.280678191793203
3.20829222723347	-0.0207870989419693
4.3476836540813	-0.0460946772092138
4.74278688606405	-0.553139576599044
3.69280092457047	-0.0542488355633592
4.44904101477035	-0.211052533453745
4.71830844279693	-0.329474114587158
4.77526971066507	-0.134267653688253
5.25693692546999	-0.207903356532145
4.88670923860921	-0.498063499109888
3.88761231125008	-0.0751091211760874
4.36021115796475	-0.0221645605928216
4.95138184108005	-0.110552765195338
0.595770304154883	0.0440981158774708
4.57407126868454	-0.0677947484199808
5.09480528378373	-0.128128803997716
4.33852598875507	-0.0957039660049754
5.54497117014011	-0.0851100832363926
4.91272985544374	-0.228360496239785
5.52100709308418	0.242212269471829
3.2724174324361	-0.104106265488757
5.42551111562366	-0.241372048792969
4.85431217962888	-0.456727994577321
4.8783841468848	-0.13580857513471
5.04332192068506	-0.597836354352821
5.03408346094051	-0.198289245923873
3.100262799515	-0.0158222158775484
3.51827843055768	-0.401880786567631
4.79962294738199	-0.183391601957825
4.60925233734945	-0.237189197704175
5.00956139150427	-0.0408247507791377
3.44451905264289	-0.0266478877747812
3.83277397703267	-0.095535027721079
4.66346910801382	-0.324831597673348
4.263132160256	-0.0188956304955512
3.98313048022358	-1.45822535966401
4.72212664278919	-0.222079963722919
4.02420959376969	-0.072373149273943
3.90985509096899	0.0571080484276248
4.73048821579199	-0.515626994310131
4.88580848344751	-0.110889097267564
4.52490914645977	-0.149794011629122
5.0400924569274	-0.750805972247027
4.93567910921925	-0.0409891827697417
3.97104356323616	-0.202469531473317
4.31313696833647	-0.044652630907719
4.61934954908233	-0.2222055601849
5.0167970537227	-0.0948765077541642
4.32748104615173	-0.101093257827467
5.31831294448951	-0.71739628695851
4.94575332840539	-0.291793945892943
3.28973184312716	-0.0134729462927545
5.03368997218966	-0.251454982608184
5.21872928065871	-0.195077557719779
4.61721240986093	-0.156043813897063
5.41763412651508	-0.72579466164581
4.40374658748381	-0.0721684370572222
4.38084079392951	-0.281247751777825
2.75352113970029	-0.16907260932959
4.33173829353301	-0.141894693663486
4.55478141322279	-0.20003133399972
2.60852775668666	-0.0763831666906349
4.135631623253	-0.0526981545850558
5.15000231985407	-0.0707509170836528
4.79294513895712	-0.10371874791375
1.18773353070326	0.122090074037055
3.91410444143512	-0.0885026694633855
3.80022337809448	-0.0660675665597721
4.52749698122383	-0.219553295137718
4.43663087820506	-0.124376865698738
4.62868075023669	-0.0653984597046415
4.09371711963522	0.167071197928323
4.5600957679167	-0.15171597965138
4.23823874112333	-0.0348515887124298
3.91193788395472	-0.0589332087371601
4.78334240363914	-0.163501115956985
3.76835103828652	-0.00828386592986872
3.65740758808703	-0.0197576661526405
3.88714506115868	-0.244930790001763
5.02291885663628	-1.09262723584468
4.34681099684692	-0.191859782805267
2.12238544224801	-0.258284132230784
5.00330386645564	0.0176062502772239
4.88229785588515	-0.0183145434882451
4.08605729858953	-0.0388607765920968
4.58719530588918	-0.0410276697095523
4.53734737117301	-0.26239645804598
3.63941534983903	-0.0771853023137779
3.92812049899087	-0.317728016076952
3.02563159060483	0.00906596229083586
3.59947599415652	-0.123228890001235
5.00431250682094	-0.127361071955689
5.17674642751108	-0.342349349899572
2.73061419965696	-0.0828728283307877
4.08260472371152	-0.0404628374442438
3.52710156185385	-0.077389747965431
1.04333385958147	0.161800323792208
4.36956073620749	0.0170890914666328
3.8703724155884	-0.140549436637549
4.55932734982448	-0.105293958336792
4.54815204706434	-0.0132195308811362
4.41044692209132	-0.0320335947353856
2.86390225019083	0.0814476466733003
3.06844901963571	-0.0193226350553316
4.69273875010283	-0.0964765460640998
4.19271995959024	-0.432645429844057
3.81324375279835	-0.0708202861426629
4.68321452310869	-0.159607544196246
3.87360382729343	-0.280830800065807
4.05150780889979	-0.0909746740324715
4.31478842493076	-0.263026700824897
5.03763234702002	-0.201290035587189
2.91626818728863	-0.329953846535595
4.26527984096996	-0.105050680587418
4.42409977890445	-0.495277647673289
3.28625618651973	-0.123772180607242
5.07320858447329	-0.224860341985888
2.65387671955437	-0.0938319545455014
4.21480540987685	0.0929671247620507
4.28701700530042	0.00254734214892758
4.93606932787785	0.0951936043594942
4.22045351433052	-0.177900580074403
4.45814738978298	-0.0805209004935063
4.80409985727903	-0.262814329711986
4.78910268164701	0.14438149197356
4.16466499440948	-0.0617074782933249
5.02580630608705	-1.04716712285189
4.00316947215966	-0.104965230239063
3.97475896167034	-0.29644997802636
2.82741121808381	-0.00235886031880992
5.32147970710809	-0.136712911560782
4.80238555747973	-0.478752981397227
4.56196685081594	-0.734034446336155
4.80552869628161	-0.294603240119698
3.70642822176139	-0.943428408983223
4.82105935164277	-0.281320835862275
4.49142134611952	-0.0172182545389341
4.08037377681361	-0.0276562078987486
4.24253235912033	-1.80881394803366
5.0511821924756	-0.213144054313981
3.85398148542046	-0.192693282483031
4.54101928273405	-0.114320646520214
4.4816498211272	-0.125111574335945
3.85639067946399	-0.206844079552693
4.44995133542665	1.01723496590204
5.29549840299804	-0.249676453286274
4.85540736701284	0.0344510539782989
4.44463888488302	0.209834043227112
4.00809175192827	-0.0619755144186057
3.39329369027651	-0.0938670712442087
3.6494668810601	-0.143055009009382
1.55805010829783	0.249830228363477
4.277147928937	-0.143785502446684
4.65333023241338	-0.130501678481832
4.2525776502694	-0.272135296899718
3.80928216063918	-0.0706253373405455
5.06581308357167	-0.869101766445339
3.36279979804359	-0.141496918795819
3.60640333183897	-0.198077942323032
4.44868660441316	-0.417703181480139
4.40800768404162	-0.190278944143081
4.21596674190629	-0.143902993225693
5.0215591091405	-0.859004323945299
3.88869995096065	-0.551870485288648
4.93542993915644	-0.249395890870749
4.9951433296808	-0.498326782884131
4.95792878511935	-0.0942528735632184
4.31522893240732	-0.183975483301327
4.70130008109717	-0.646349915293383
5.0305574357474	-0.207129461810947
4.11268378786296	-0.0861565730942661
4.18254397339202	-0.542716881732825
3.54911138303441	-0.623267714471367
5.24269934358168	-0.109537097336019
4.13997671769907	-0.247399207954366
4.15736451033594	-0.0412234243903419
4.56834439391128	-0.181395457523566
3.90661750530673	-0.16088597121362
4.54576290110905	-1.14194578833493
3.35772093905239	-0.0553031517227649
4.83890834303308	-0.0617310404137212
4.60039826509806	0.0557214824068585
4.05454077620201	-0.0771270168574887
3.52383845076479	-0.181197689275781
4.44560103228014	-0.169855700154131
4.82056076731974	-0.0804883387610253
3.65791899636419	-0.0606386548689984
4.32606161529781	0.165121226170671
5.70520834613655	-0.279627509530606
4.91284242822973	-0.106406487896462
4.59390004789515	-0.16873282291135
4.83683241515502	0.100065533231336
4.06082058439522	-0.345761145691681
3.55661380396106	0.0936481402001931
4.05141056508416	-0.605152429560355
4.30192538485726	-0.0232277183555643
5.06634671836725	-0.370367412543443
3.5234912509646	-0.178062697691553
4.06839304708809	-0.45327950704322
3.8514106532399	-0.296865412962225
4.54920604831078	-0.654682381727031
2.40275297141827	-0.255231443425123
5.49467379148274	-0.412797194713109
4.60067407035492	-0.314677324452928
4.84416540905613	-0.175336013318714
4.66202669558435	-0.497281931905891
3.81785950841315	-0.232983532509179
4.89897308091536	-0.361311094048153
4.81802161757303	-0.548000383619446
5.16880930261514	-0.105723023154212
4.78834490324985	-0.213966230571394
5.08111929764205	-0.258562768042668
5.13715934158032	-0.0254359357563183
4.56708960879578	0.0109002458408666
4.51041253362701	-0.250138600418941
4.15864753635761	-0.137815024823397
3.87427159287463	-0.25100429129029
3.29364292287208	-0.268765234303889
4.4178067516821	0.0244985350462035
4.60271001815286	-0.135068766968938
3.37675991260085	0.154253769363268
4.58098499238537	-0.330927390997698
4.21360537660588	-0.0961920721499719
4.0171581893902	0.0366400861297153
4.03991681874404	-0.293181923133255
2.61610477322326	0.0876350960370372
3.3583100418367	0.0706281445025867
3.03048655829816	0.00132107627883343
4.42887361480108	-0.154443782775471
3.7044232361522	-0.215100995732576
3.78374523013357	-0.0262272584789379
4.4286744907957	-0.483271375464684
4.08822866054016	-0.369317446912115
3.62274398023555	-0.429912959400554
3.73029826014143	-0.229793806037514
3.73504891532014	-0.0408367516663072
4.46286443047215	-0.425424771826405
4.45205761093494	-0.159674420941565
2.5843026933533	0.0725835253147191
3.34733045028211	-0.0170389953465915
4.03395999380895	-0.268488515421465
4.59914688019509	-0.674110592577112
3.46690699611061	-0.181047821032751
4.08944455028785	-0.285823382393776
4.11943793734011	-0.171985826191198
5.17619410205373	-0.269615581590576
4.83134803643435	-0.132833339893036
4.26551154941979	-1.07010340003145
4.38172063853295	-0.195359505029412
4.38634549259412	-0.138880234476869
4.05729071266756	-0.170514074392885
3.73505861836035	0.00786936007279707
2.29653221582936	-0.5261808821453
4.81541026083959	-0.0155817896106381
3.93500930267219	0.0383944153577661
4.8685906989761	-0.0196606638849416
3.1384709597132	-0.148247665326618
3.81060767125568	-0.0602773260869914
4.28281244588055	-0.320427980060893
4.16667838628274	-0.258319358382969
3.94078488314912	-0.153388904438806
4.87066666204707	-0.0325635079433538
4.08777922913003	-0.108194739292172
3.63712210805037	0.0715769951995573
4.70253387561541	-0.244137114624755
3.65535675292322	-0.15093182157026
4.62702230088533	-0.142891034944737
4.96122046746464	-0.158811148881925
4.14536848281948	-0.566470824523378
4.56575147336149	-0.24924476435849
4.50016342726294	0.0256532606138807
3.40550482405502	-0.377060271680727
4.43396932544539	-0.351329354313618
4.10873668955466	-0.0527660122663096
4.60046001154491	-0.0546902113657639
3.5147300595504	-0.0919832448472368
4.30003385776424	-0.13307233589974
2.76919117210151	-0.0846651876864977
4.58807202973156	-0.538647685094749
3.64272986731849	-0.0847001679589038
3.82043258578884	-0.150249794781693
4.32238621480104	-0.316442420983545
3.76379534159569	0.00144440362255326
3.63923850551983	-0.0158590099510619
4.07179491732664	-0.166148820788733
4.58431227082918	-0.325843834605783
4.54543677445891	-0.142884378633756
4.53253733535556	0.00175270487037584
4.25861494719719	-0.0326650412656454
3.91633670687553	-0.14486439542939
5.02224104062692	-0.572302800640948
4.40241033936058	-0.373934929349809
4.62004984797856	-0.0877050656390122
4.50941510541023	-0.241758241758242
3.45765731625571	-0.0797330525549858
4.68390853330367	-0.0425891191746336
4.70538062128158	-0.141314391947111
4.0238507005696	-0.237773843713921
3.50058315804569	-0.266265338845292
3.538714508295	-0.456420865088846
4.77019232597544	-0.440091901754924
4.49874584838891	0.313183802707239
4.45406827919192	0.193622618919016
4.87612014329763	-0.680821809266799
4.06263010942025	-0.201837940227844
5.76779956030119	-2.30784727190571
4.51180401521536	-0.410252112896495
3.69932386756663	-0.163461179242226
4.1329787202739	-0.00904131762474981
3.24016770235906	0.0945221739718043
5.46141713668231	-0.146337271344121
3.64618054884371	-0.629423137876388
3.74243404891979	-0.257971707246236
3.77218866972273	-0.133061590893671
3.97651726910359	-0.0361578219357862
4.37351391537746	-0.111953908450974
4.2371678434283	-0.183597591087124
3.64332034570134	-0.484539169252545
5.31745378085276	-0.201864021652863
2.68940377359442	-0.198745963100294
4.61480380774094	-0.11284942497333
4.26042079261956	0.440022139079442
4.4716216739343	-0.390073454220236
5.42320176201049	-0.440681232867083
4.60817562566971	-0.415383006977919
4.03911507849967	-0.247532315239668
4.21867173205144	-0.116198311440752
4.36421803104174	-0.202395185577646
3.56829702131026	0.277702713973544
4.77851256060219	-0.363718858274214
3.95890574895973	0.33416516639632
3.70647277796827	-0.0438487072356739
3.6750078000238	-0.0712067041488671
4.32520944083591	-0.138599933967923
4.64952107294191	-0.563473559942104
4.14803234609668	-0.0689283135161158
3.80116124525611	-0.315384062657183
4.09591532156489	-0.960335608774343
4.90748885036137	-0.0359028410212645
3.17504329332259	0.158260073149717
4.23691380703	-0.159355593312822
4.81251803311646	-0.13563202033183
4.88278284833229	-1.46845728537345
3.43233293094658	-0.122987742365373
4.67642115923381	-0.445086145459886
3.47366809090326	-0.150449255907035
4.1122670545894	-0.642551061899845
4.62617458030785	0.609030653727466
4.17625360093077	-0.284859566801563
1.74176976057529	0.431076672695968
2.24735551260263	0.0544851966416262
3.84426042546614	0.272810444587304
4.93326501757875	0.150326401099457
3.50687080878767	-2.71801619707799
3.39857511953566	0.430260590938534
4.70260240378671	-0.0482104622925656
4.45192180450664	-0.130991100140046
4.59010351057095	-0.139974448814892
4.3404952704625	-1.18143298459126
3.57690922532423	-0.136908319099961
4.35418821393673	-0.0818312067230271
4.32902654099455	-1.17099883914602
2.51228697426567	0.238404714810481
4.42445156487692	-0.242003642769547
4.59479990249521	-0.276205812280768
5.09351770021973	-0.505890396549901
5.22746376797868	-0.0901448454964815
3.71437306691183	-0.103829855962882
4.53424184153972	-0.112336287003364
3.07107001318807	-0.08581821551864
3.20451965428797	-0.173577199680366
4.46388579723473	-0.452242191092184
4.0803925452808	-0.0597161535074348
3.77839468018313	-0.8533586260628
3.9955497166227	-0.157939464328709
3.59963852743201	-0.435694533817975
3.97690793944234	-0.32908712694786
3.67301523662277	0.107051285041462
3.78899271001551	-0.0275459528969851
3.71329915252431	-0.0995046251207531
3.75391512243392	-0.118672215547945
2.92130401817067	-0.0610690332376446
3.82742670120936	-0.541311888994006
1.7411725314788	-0.0525610492383234
2.20701754090045	-0.00982911758850289
2.16502497777316	0.0182818381682017
3.86598235314071	-0.171817076905926
4.94603974700401	-0.0784982759787711
3.91534950284423	-0.0323211948214613
3.41991709091636	-0.0143404615983349
1.90030077147597	-0.0103836452323989
5.64663292948352	-0.0633147440072309
4.64569037594481	-0.0779063739663745
4.53751795997032	0.23071903992077
2.71622808390572	-0.144575632589775
3.83457970555677	-0.0609223203855457
3.34921561568255	-0.0107066967516528
4.39343369734469	-0.174381406677211
3.89263659155862	-0.0668926553301292
2.65305877723163	-0.0641662690034259
4.44464584812309	-0.167881316822539
2.26199648714469	-0.171078503534868
5.20027331169563	-0.346303653143535
4.24143250175795	-0.12023495465103
4.60437865082601	-0.051344783263243
2.52892631989987	0.28272005488564
5.04072278253119	-0.0114230590113764
3.92528760755782	-0.087728087409155
4.3664988626468	-0.210394746877155
3.57506858474594	-0.338326272015746
4.05975071645778	-1.34079613764377
4.28124387912992	-0.181436592088728
4.29104205003147	-0.0757033684889757
4.79264443793584	-0.174476672269403
4.46552814442131	-0.245487597450504
3.96893712920387	-0.146205547313458
4.55586441363184	-0.450915762899853
4.28126918982589	-0.122236777583988
3.67696645137851	-0.0562404310029884
3.94797359074699	-0.00105122321381428
4.94506088058055	-0.108243321891781
3.72038608165543	-0.217147801685533
4.60094425018299	-0.111379669421948
4.24838455959721	-0.186889566003213
4.59162068221118	-0.226684189699774
3.37396989389929	-0.106462443149978
4.08372600963292	-0.079260146743587
3.92632976498524	-0.0624675220769061
3.9040429226099	-0.161144600130379
2.63842268821072	-0.159617122864443
3.69793114539685	-0.0302561253535073
3.22298901166353	-0.0411848015397905
3.78443864461357	-0.112238909350322
2.9106933326971	-0.0859231256255581
2.40711679207513	-0.0751325258230866
3.42529411949367	-0.0895695594646294
4.7933642897555	-0.0598381875284414
2.81106244802601	-0.00534455063601237
4.75487000778519	-0.295558223694526
3.90937358326274	-0.126222294249986
3.18035104217886	0.0525787793028988
3.63585697056853	-0.0454814650865861
5.12204884399566	-0.279446567032083
3.95738358648903	0.0703648446374269
3.03107378825671	-0.0339024832603175
3.8620163491121	-0.0803161475160149
4.04922712327242	-0.0980138505034547
4.16372442479114	-0.0530059046522152
3.77255543220097	-0.0986031084799559
4.91654122318515	-0.0450930022443571
3.68752072083646	-0.0897579784378771
4.14914548384258	-0.175731053241438
1.70001600359985	-0.0255229276634033
2.44282193591788	-0.0761829019583141
2.71750264956813	0.0511894605820734
4.2316255220853	-0.096116175538163
3.95221110168226	-0.110529496136692
3.86539921007129	-0.75458392101551
4.62313709158059	-0.185980010294872
2.97792562063412	-0.0650223560010535
2.69928205893023	0.426074551962112
3.94878452266357	-0.237291078793144
3.55797429052248	-0.0119907463170089
5.02265931558937	0.201719738543814
1.65996860909946	-0.0028204310119388
3.69131281242462	0.0577775663761293
4.10454749675028	-0.197245562794878
4.09917844930813	-0.230543273156402
3.80356850134979	-0.0871947397016003
4.48528266944402	-0.181177272375484
4.33006482250577	-0.0535778479359464
2.66186162213618	-0.000631893382352329
4.0493999107947	-0.143848090315653
3.2771631504186	-0.127210424143161
3.30170127936179	-0.0830872276752931
4.67313427017352	-0.0989988066253011
3.6195352476124	0.256936303243453
4.89267513784668	-0.0846496184321827
4.21030608844043	0.0608742893796638
4.45404067609913	-0.182294659741153
3.58388497905382	-0.524985655531271
3.07362460304066	0.448263424484383
3.36300690253595	-0.0118726529007014
4.55244902996439	-0.269644393587064
4.57540945638794	-0.143842481883834
4.55755408664636	-0.0942837392067509
3.99515139317588	-0.00462580334057627
3.72355443900996	-0.0065774955687327
3.8152131744047	-0.103871986545637
3.47874205787331	-0.36472219788641
3.81732200678549	-0.000545408010502212
4.05031489534111	-0.0803510949731569
3.1506797840014	-0.0310019824490395
3.79590510889607	-0.696991059629059
3.49799279112791	-0.073445739370543
3.99105212919878	-0.0842687020490012
4.20497979301732	-0.0502469470804674
4.28353880542756	-0.0767683837046023
2.64879483688757	-0.20724783478648
4.56347846003677	-0.936324167872645
5.07443093298556	-0.435201959944848
3.14581372486803	-0.246514911718553
4.56965720856633	0.0523843873150912
4.00539661075332	-0.165406942671761
2.63216339874828	-0.070607746487906
4.76507206471816	-0.300320726754381
1.38187560498274	0.0756329032730134
4.06097204708774	-0.304582210242585
2.65428010683461	-0.0553496929392827
4.21586525776381	0.0543766995999691
4.35246695812702	-0.284415808832605
4.44499564345699	-0.264062132266414
4.45069684331277	-0.238352792002259
3.65149595568344	0.0172622180490442
3.88354269195691	-0.0726544527819801
3.88719564837158	-0.627460021916873
4.04067759525114	-0.197156885441578
1.66473937079898	1.13947224722915
4.28506564514797	-0.104796317266107
2.70780566256695	-0.126228060368826
3.9546943996556	-0.252121257200864
2.23964515773802	-0.0937281505858387
3.73231298937515	-0.203958436417616
4.26508114647143	-0.0298829802727802
3.82922308541939	-0.113142794116833
4.34933830939875	0.0526162954081345
3.53823503554919	-0.0228754748428782
1.329726679965	-0.0531439347412361
4.29602376207603	-0.298264083536885
4.12744607371146	-0.22260665358188
3.1578072726803	-0.0925656759164123
4.21452712076172	-0.188792737593988
2.69590320470271	-0.0376886445145275
2.93192294124111	-0.127648123038339
4.09057561292059	-0.0612009003830123
4.40836751054262	-1.20094009088702
4.79490650140062	-1.49397267107825
4.10730050493571	-0.173748858125344
3.97531943989169	-0.110492326615084
3.95079665149784	-0.110053485234523
4.49943533224981	-0.171068889023404
4.53197055298106	-0.251552598962608
4.38223876413714	-1.24921854335778
2.76695755828064	-0.00620790598568341
4.20181407437594	-0.304432639683671
4.45457619449663	-0.240841227751285
4.14624633793514	0.0178264039803093
4.09675253906627	-0.086169461916876
4.01018450788847	-0.14242211263673
3.81853425965473	-0.309422978263296
3.06426186082974	-0.119398755835159
3.85475658740698	0.129834711006378
3.74674328147864	-0.0976242518891291
4.39809413328447	-0.0761628361586392
4.380753795665	-0.0584511977556016
3.23065419574767	-0.038765872947025
4.4145455135608	-0.0552567279330086
4.61506298806878	-0.235854613708735
4.47770877889734	-0.718665143804132
4.16013046983177	-0.139693352989922
4.36216463702473	-0.247310647285458
4.81552171653121	-0.0499732239813965
4.03148305737038	0.00532534132654494
3.83032433971481	-0.0136327965319178
4.5647268597696	-0.12217234839642
3.67378188853578	-0.187389438808033
4.63556886042837	-0.159415812251072
4.24428604959827	-0.129563329980171
2.96323431611965	-0.184260672021875
4.41123751438133	-0.0638066532672593
5.08355039345984	-0.0832507434355896
5.11079087114817	-0.298304228558275
5.30672482415294	-0.211055504268718
4.5059030803887	-0.178053802043312
4.63258134727399	-0.462803692830892
4.3423592412524	-0.308095330184839
4.19992341724567	-0.174516913525717
4.63601213819858	-0.091585908879725
3.99795285840865	-0.0220226032258206
3.49052527151891	-0.0753106952386304
3.61854877954298	-0.38568076020467
3.14743031481501	-0.234533613656025
3.7346049319703	-0.292582849043856
3.96835859352966	-0.595880806310247
4.48460309776007	-0.363133152710241
3.59978507872102	-0.0192382967296992
4.36822149380436	-1.29542988062219
5.05605478957362	-0.221152369193201
4.53629223178977	-0.631404657100214
4.31275601047473	-0.0429524302244523
4.70331191568847	-0.518729369814192
4.07625098460155	-0.105442860600173
4.94885668737786	-0.542848116827049
3.3397693001186	-0.277795177704109
3.92843705666648	-0.128801094904014
3.20573185157001	-0.270327451101567
4.26172322933993	-0.129391375406103
4.94811757199467	-0.529389299094312
4.60779484576954	-0.144054545847668
3.19073281374135	-0.162748167841398
4.49371272081099	-0.165597286349399
2.21788396733286	-0.413478378202748
3.74499277545534	0.910854715686351
4.21093396845561	-0.209246538830589
3.95021466194432	-0.133953826256238
4.52448656075867	-0.539940828402362
1.85743384086779	-0.0561250881988558
3.70780872599475	-0.059906904159716
3.64342725805475	-0.656899942739064
4.11050116937302	-0.288569394358733
2.14841161859629	-0.248288703148131
3.34724331494731	-0.457186202094058
4.46653271941503	-0.357205914809093
4.00390131274597	-0.182123829606305
5.52424432846215	-0.291792719820437
4.38264401783009	-0.316277160093499
4.96801137501457	-0.127210390139275
4.40772763338012	-0.119021470071074
2.11025359427918	-0.0883022909964746
4.62879961289605	-0.210426324666031
4.26936324470777	-0.233772387760019
5.09004248748773	-0.237106892176618
2.69801646264016	-0.5855663314686
3.959492809685	0.112878717687389
4.9264853528455	-0.113394409833566
4.09035201273297	-0.501842373639547
5.22645393487769	-0.375844584408774
3.94931870199047	-0.124361912979249
3.48635269371673	-0.0466601543638619
4.65112228081726	-0.10626914858011
3.372324185076	-0.0825232048658153
4.50663201457881	-0.255524814576034
4.97392338558927	0.0749567745991818
4.67861744226915	-0.0109622484849576
4.05216065921143	-0.381741811519729
2.28700123902038	0.048428551479158
4.18679171775618	-0.0937515838160128
4.29181563337588	-0.250134760274395
3.97985537837727	-0.357257884702941
4.4868304944866	-0.348753790400117
4.13969629063692	-0.213675786243076
4.14977198117913	-0.115951322723307
4.04587970642682	-0.127483509104554
3.4563359168029	-0.11585582099165
4.1360678002572	-0.047966153926453
4.21118982896621	-0.104518028250856
4.10481436988604	-0.564003766131428
3.04210049669429	-0.230708986960574
2.84038680093188	-0.196790445787352
3.72749434443173	0.382733658138239
4.39916385564188	-0.252530764925746
3.78600314248926	-0.149448890460682
4.39838319256228	-0.21064549870484
5.32929324885334	-0.732439911194044
3.98632347066707	-0.200477795033344
4.02417316640373	-0.173481579664036
4.4698921275374	-0.0938402651612333
4.24918187158919	-0.311373057523841
1.15051499783199	-0.0710767235852728
4.75281699653247	-0.0759596926849275
3.19516632596004	-0.437084625609216
4.2864865531855	-0.262808282100205
3.35785692413855	-0.0075541803566707
2.03916297603361	-0.0547531945595857
4.51585765949739	-0.353545449462193
3.98197473774461	-0.106172973148277
4.58234155471587	-0.220919586124284
1.22648178230095	-0.178032014383497
5.06863249452064	-0.330346951946411
4.79383270414028	-0.218865977904194
4.24066829449917	-0.407869249394674
2.39367473608538	0.102665363204778
3.83041004941966	0.103902435430155
4.19017137577793	-0.17423555524297
4.81352591300482	-0.796497649253835
4.06522892594844	-0.717970793022178
4.23875772605715	-0.0995004163197318
1.11288624837399	-0.212056671846478
3.69378995455504	-0.321871741938448
4.58903740221439	-0.67284325043536
3.99989458893708	-0.438251877385201
4.53387154544925	-0.0845392598300066
3.48283150943665	-1.00883306078988
3.1260937232657	0.163155741710801
5.15929736307097	-0.285674627247128
4.04736897178368	0.165021597006335
4.75293200883343	-0.473898235347724
1.41409231596816	0.0420878596977861
1.19525685370705	0.068738928967008
2.79292595954303	-0.355229591836733
4.19739567104608	-0.104503872932088
2.19066375405635	0.236883708563585
3.42732863862827	-0.0259376568157162
4.62251518927693	-0.416862076569072
4.33204439042708	-0.228988942669373
1.73709532074701	-2.56306920463139
3.77472234715675	-0.830949560311411
4.7160282745781	-0.0448870643228781
1.95037866500386	-0.559603214242811
5.03035680084547	-0.495270112557705
3.02290126028295	-0.126483654930044
3.16937932524038	-0.137836814886212
1.71468224436014	0.0709305100773143
3.87793223754694	-0.118362337762457
5.01929584390851	-0.157044379927755
4.14101689766871	-0.565476281852734
3.51574985139591	-0.0455040571340977
3.71534354010034	-0.0171155531670453
3.53998648949241	-0.541079347481787
2.02049816250533	0.127217066408397
4.75802798236701	-0.899590706309717
4.32758134381704	-0.344892603481548
3.71704394006854	-0.120811309354803
1.08804562952784	-0.0463938529432833
3.48234940134977	-0.0833524346625249
4.1836043229985	-0.0940552926005559
4.86799882759393	-0.137561532399194
3.3734470304366	-0.0573639971840158
3.631491559286	-0.0460661960992952
5.02701535295488	-0.160593201507339
4.36873547370635	-0.100538703073548
4.38885103988218	-0.16388927709154
4.06528470137935	-0.0718065827240713
4.42999330113641	-0.173276379895477
3.4247737344435	-0.0848553960835154
3.79111800022115	-0.125913257156371
4.84452507504952	-0.0359377327395554
4.44392785001999	-0.0723891378552929
5.07817039668663	-0.0279548130688311
3.60097161036972	-0.0505233216011993
4.33344294434977	-0.100359491389714
4.76127991496011	0.0407260043301667
4.54515771966619	-0.0447019718535032
5.48506995465774	-0.197117310471084
3.95482329892516	-0.074326638554753
4.62758869131979	-0.0377909339168636
5.72110638389825	-0.217544007869217
3.416762688211	-0.0288443848386387
3.55032296228891	-0.123447721304454
3.80656217918595	-0.241244397743948
4.59515264473049	-0.157065489592919
5.0428237305616	-0.113311689375668
5.30962333244044	-0.0727996797472501
4.18169251906107	-0.0371361638207957
4.32367580205261	-0.130143330833025
4.45962754704628	-0.060972497628143
4.57801424396733	-0.212990156909322
3.17953694929393	0.0352357648901953
5.10558105946203	-0.14804138978173
3.68711187474947	-0.177713987022756
4.75462866209046	-0.526706318970049
0.653199274099016	-0.0193369413060167
4.09185565334367	0.140844714752766
0.93753063169585	-0.0304018530920442
3.67882137144679	-0.057320527649042
5.35083138660496	-0.0497627143295606
5.00055986233349	-0.173196673689067
4.7676641525717	-0.0936450292182699
4.48272776130789	-0.0860687263796298
4.12681531446727	-0.143503825529327
4.33522030983231	-0.104893876728977
2.1496489558765	-0.287539674553539
4.82811258500362	-0.286222973282453
3.47600944692419	-0.0336605275300956
5.15356237466224	-0.0454375925729345
4.92859678880571	-0.840142180226151
4.05329758515393	-0.357639417951227
4.4810505295316	-0.0581219209809797
3.95112289689295	0.0640704603667976
3.66494720259269	-0.0262671230617172
4.10269943950186	-0.168529223049625
4.07470702119007	-0.431800893188477
5.00167382452191	-0.266357258108378
3.98546505648556	-0.526077540028377
4.72313280509404	-0.118940214244711
4.45369947419722	-0.133517948919395
3.76125799893131	-0.0578528609507961
2.78139634193523	-0.331205366803722
4.46825508806121	-1.00287661410348
4.82130443617754	-0.214027759138001
1.66105672390265	-0.0663131840692378
4.74771637358363	-0.533126481766405
4.34748838417719	-0.0929189164360303
3.94181253147997	0.0175184232328958
4.53166007826534	-0.108103847285831
5.04630392024713	-0.100649350649351
3.30331647245931	-0.0508670315947624
4.86977900042682	-0.212997614162343
4.52818263734122	-0.625178782414029
4.64475351139286	-1.08209948564573
4.81406440025823	-0.389117143663116
1.82126963808025	-0.12263197514199
3.80682746501031	-0.783753077068735
3.38951152179419	0.0184039522697823
4.93247066450442	-0.0141438094762461
4.15001189999141	0.497419974257119
4.0505584496486	-0.0269015403622737
4.8047792046634	-0.122235257582544
3.95321605579428	-0.0406427563209927
4.23884018751446	-0.0469583488179297
4.49929077884743	-0.233022768067184
5.31770385532807	-0.250080552891897
2.91833505308304	-0.178439558101702
3.58238331805664	-0.0631551330028416
3.42311345462362	-0.431195847327185
4.98550623804298	-0.249792826432421
5.17470938101623	-0.355268416430766
3.37362715213374	-0.107238550972774
5.45971550680115	-0.801240280031976
4.8952932833909	-0.76096508748102
2.17383263425331	-0.196805449264129
2.77294675134746	-0.170291749413972
4.13198881772343	0.00429616984019193
4.41621719414967	-0.133465084864063
4.2338280191485	-0.200596009489821
4.86203347317125	-0.0847820051740893
4.27014521750448	-0.121784379821207
5.23720543605715	-0.178580511051404
3.39809252280802	-0.0888171350392743
3.32601737784553	-0.190631726066252
3.63427601077148	-0.348525102504507
4.63404478087097	-0.359004400073312
5.40217405909955	-0.215946351026181
4.24644209484034	-0.119391665728969
4.1247108142314	-0.212053661571936
4.32367417838108	-0.0645828647940678
3.90153094428658	-0.270653587046448
4.27858762645288	-0.14234041383018
2.69034935543544	-0.00568824683025768
4.77949791924654	-0.882337648661627
4.47039816118037	-0.637122971631846
4.09455038421867	-0.047413399298533
5.02493917280957	-0.252445444663236
4.52308436114917	-0.19134426731721
3.81354644204795	-0.0547660585669272
5.1379621755655	-0.374308823414268
2.94537619717715	-0.0724784652924743
4.61578375690567	-0.306072931276297
4.2926721590411	-0.0993997146184245
4.7785838913774	-1.71484996366921
4.26149180280943	-0.554681739985253
2.87600821045907	-0.0700650252185717
3.03131215410756	-0.269647884280408
1.25527250510331	-0.383179818531758
3.82909273384737	-0.131824630255265
3.88179893174519	-0.390135956811346
3.62872892347836	-0.0161629236243436
3.14472784628142	-0.0714476826823262
4.87365718165974	-0.368393325905717
4.03641184713784	-0.0473328675411854
3.63793017317396	-0.500873352539528
4.07396889709316	-1.06935461676069
4.03545243580851	-0.151351664023813
3.08455253092695	-0.135541908092625
4.39246260486382	-0.175116139515754
3.8352224868385	-0.156940929266639
4.23078158221815	-0.168616521489419
4.4382993811973	-0.178818823479855
4.26015498782204	-1.56987286465299
4.1817436491342	0.163116370808677
3.98082322108404	-0.241290916962721
3.26407232778647	-0.102834535867901
3.54704813612755	-0.133286690741747
5.04082683964798	-0.058220308570206
4.71379171075543	-0.135734181658394
3.66615829108596	-0.007967930602945
3.39186093374502	-0.0349037171959384
4.47487107632811	-0.427575605632617
1.62035253696871	-0.0191733325811598
4.24506759015053	-0.0979826353932417
3.12665492584336	0.902520767688341
4.69978079180512	-0.090747616088942
3.43855533366944	-0.302066746284502
5.00882193547601	-0.357954884822903
4.1788551493061	-0.239179509966107
3.71453885598871	-0.0547076415386189
4.12993074366083	-0.261970744873126
3.6078695425784	-0.074822985603051
1.09487157428727	-0.0079188337344957
1.17918577908088	-0.0282000458914165
4.47332040584083	-0.137471678424463
3.35737777017793	0.142836549242383
4.38998222140349	-0.187787830853481
4.12836160242587	0.201871868794708
4.94507682156301	-0.42999624646782
4.5656612466566	-0.753720262113045
4.50543072629157	0.14940572168246
3.37129803540751	-0.0607272960054496
1.54848384431215	0.00119309202489461
3.31205544587568	0.300642410301006
3.85249622796043	-0.0987841401607783
3.87857250590939	-0.355423186204665
3.88737142391175	-0.372831433050032
4.44347071127326	-0.647731976333666
3.7227061607692	-0.245628205149288
3.8222169032838	-0.295024102507952
4.09705289606816	-0.063718382448123
4.50441186370566	-0.146000906191537
4.66746888519301	-0.409287734851077
5.13095090605264	-0.261046195596643
3.52096164862682	-0.00582043749794811
3.98436670385994	-0.208076559581742
4.68092598719927	-0.32832007989715
4.35596933745103	-1.01690873194285
4.00100369037133	-0.220730546848824
4.57329125234813	-0.0802449648559425
4.45054027906975	-0.438945169654306
3.73792265795593	-0.105550777612356
3.48554690402702	-0.167345195563813
3.76445333514469	0.0616007788201099
4.60369020299969	-0.273933182324102
4.26121719916508	-0.169974882444714
1.85919565295756	0.0262973702027961
4.48288126148143	-0.712692740732669
4.41959430301434	0.0233795228178034
5.09104740417053	-0.437071896332828
4.76581856538248	-0.235330980782455
4.9254808884706	-0.414357744235148
4.40805159187894	-0.539928844300867
4.44464141086753	-1.23045781536886
4.66421223882208	-0.167712393116244
5.20987622926833	-0.202680703763003
4.05467878326919	-0.255827096797714
4.95454368472392	-0.390134641373442
4.79323928104609	-0.335874340169745
4.28406370718089	-0.487990378458824
3.92227743721188	-0.17408046157223
4.21644585035145	-0.131547266844305
4.01900048553059	-0.122292482372964
3.74440284011444	-0.0851426581371296
4.10736681397959	-0.12168169371655
4.65898181756709	-0.168193027053155
4.78968398309743	-0.118936162360306
3.79958910119508	-0.0129150285950328
4.86395636012481	0.224887251189655
5.26017420018909	-0.437518246266868
4.02796987129761	-0.196108224881404
4.08134959359843	-0.0682702255058645
3.77082496915086	-0.323711169298671
3.22849433832904	-0.131694519262177
4.56613636949798	-0.182564135525447
4.2293834313036	-0.0043905594138911
2.13950150488595	-0.0879046100568286
5.24476780214521	0.297840521288377
3.59629530881653	-0.294161577306421
5.24081010916462	-0.593550485157197
3.95534229677313	-0.238708849078518
4.3350326032734	-0.00758600389639865
4.27397169736815	-0.165712907384121
4.49438543020204	-0.224773509085462
3.72573855416194	-0.0331762340211465
3.49563728005017	0.000651602391202555
3.7149053080648	-0.1735204425768
4.10660158126031	-0.303181000064144
4.34257306502722	-0.165238584522423
4.19979043825656	0.0800024038546512
5.23633966163598	-0.495112000456193
2.24912150924074	-0.0810652156646457
4.5889052404623	-0.172016595603175
2.61404272810555	-0.1348957024378
3.92874411450962	-0.249103238906266
4.44948012787779	-0.302974273992664
1.70960955399664	-0.186313842281547
2.51398596035016	-0.167959532849552
3.04023937695142	-0.116205777465791
3.87653581024551	-0.102836399336899
4.15934906371518	-0.0415161668690478
4.26052496475702	-0.273336118091569
4.63801266678332	-0.859748240108193
4.4755726507926	0.0292118555935226
4.51291477994068	-0.279014918824045
4.08576721293371	-0.0316796105627112
3.29760941088214	-0.589897612286361
4.92791636673936	-0.21818854467289
4.73659471880448	-0.204205735981619
5.31195541792882	-0.416720242695879
4.07369257673604	-0.408855593172281
5.26708628851169	-0.19511252106672
4.89785399444095	-0.406459340654259
4.29535494603747	-0.119465658305026
4.25792373850563	-0.214611406733059
3.2053225400925	-0.161305805026727
3.93166719552363	-0.0559520337416532
4.34960928919722	-0.11724776916458
3.97593820791899	-0.188983763358856
3.80773762046224	-0.151173606080058
4.44028172678789	-0.0677883609368071
3.63668194196808	-0.088345136354148
4.80666406978687	-0.516608676061979
3.32356800311776	-0.0798131842113817
3.56117868770829	-0.208641997555029
4.02442568092234	-0.0703300564634777
3.13457016264431	-0.823043487547525
4.59901000759675	-0.277535870944936
4.74921501777787	-0.150236708024641
4.49320029675382	0.0305566640975568
4.31679948459805	-0.0401162575578015
4.00570582386627	-0.0584569371290954
4.30964383376167	-0.25039482391776
3.80836779617043	-0.139750850418111
3.62978853396884	-0.11732630166176
4.07374168221167	-0.0138992966383529
3.3728428354655	-0.394679354017289
4.00596338493298	0.300634815907845
4.23084698489171	-0.538769536643285
4.0318250807683	-0.499581956712291
5.32374325459507	-1.014918599774
3.75106379301163	-0.0811573414608913
3.37579872393478	0.0215358479071604
3.95674346850775	-0.203849357538169
4.21453206139939	-0.683154529186773
2.99413030463549	-0.0697254928004406
3.49761837727851	-0.145896825236644
3.71089214330027	-0.114239259449474
3.57939992013466	-0.158720435395286
4.79069763059603	-0.0943760550475574
3.43286730370999	-0.00746273143230997
4.84715133687101	-0.536137730134912
4.24030881069126	-0.303836689651988
3.65860802617136	-0.381478241248579
4.65323896722543	-0.353230983273824
3.71685443257531	-0.652959017130814
4.1873950419773	-0.118045991144413
4.34211121176578	-0.216891582547617
3.31638858900074	-0.0368371788103055
4.33670346730983	-0.418615100519468
4.11824114292071	-0.363046063618241
3.95456595663152	-0.190556773381548
1.30102999566398	0.238210966146499
4.19579159877477	-0.0577664262536663
3.25131757110287	-0.0418546419595596
3.67116299885665	-0.029849402415837
4.48492606780865	-0.115127037898404
3.75503942560304	-0.800626527754702
3.81424694715041	-0.333060274538924
4.71251854442782	-0.11162197987551
4.3830760340712	-0.248775671504511
4.66574648602866	-0.327968156477947
4.9252751358551	-0.288350968994289
3.46076385454694	-0.466107400848263
4.72158074540696	-0.0477438970092844
4.45291668602906	-0.198183162891915
4.39595566655467	-0.310110876250163
4.40123415944837	-0.0405870306163243
5.34192691409173	-0.314756597399078
4.56775877320907	-0.32384313537007
3.49418871744372	1.70912599944857
5.1138596341517	-0.211567227113286
4.28460622271751	-0.528389869426118
3.84205549661938	-0.266771501762751
4.53892904947839	-0.422011122227047
4.03027431066427	-0.140863619513005
2.76787690744861	-0.0973526675359248
3.19315266254324	-0.27262612099573
3.76237449844513	0.00486829266733638
2.70010495461729	-0.0137318446936516
3.40526514126369	-0.106290165806335
5.05921917445215	-0.639884956735332
2.21817783898997	-0.186134459199331
3.38132967222494	-0.0375431713721642
3.09244837905173	-0.283515332036462
3.31676387399876	-0.183174187900197
3.48594257718656	0.0690829040710946
4.6359999562693	-0.576214888473726
3.48850308505237	-0.0279579420913297
4.72818102362203	-0.567309387410155
4.11171960084959	-0.264184316175381
5.05944401649653	-0.0214859795023803
4.46646921724803	-0.283385382275741
4.33418503409609	-0.329873184700349
3.75568140703206	-0.0949469007503313
4.76097755342323	0.110070681131583
2.55207600000001	-0.318014909078249
4.92963688792139	-0.389814204535331
4.65728187652519	-0.15794565750048
3.67888691836927	-0.146643372903336
2.42917152940738	-0.344655344655347
4.79560018240069	-0.356760080822281
4.35792353216824	-0.188113770531192
2.92369022435943	-0.170060391765492
4.79713557572344	-0.636123813465502
3.75222320524239	-0.0669589833451398
4.24411840842152	-1.1213754046776
2.43610922340036	-0.0449974046520177
4.96892498997541	0.477230904045565
5.16743100685774	-0.438177761493575
4.44112035483203	0.553636976233058
4.48440013570119	0.115120455081658
4.64174473193517	-0.214042061831824
4.66544042948865	-0.265720005191745
4.95110831366321	-0.119448268267166
5.12116748854956	-0.490142832984273
4.4003994573036	0.0328456679656683
5.36541098567708	-0.537207405657142
3.69992996685849	-0.159214363314081
4.71874613683554	-0.136807415619411
3.56010724215312	-0.845265968078116
4.54987697605199	-0.267197812971365
3.63355355555026	0.80138067061143
3.87120110957214	0.668870800384112
4.15191631251888	-0.197635358598613
3.66351774864708	-0.0955044890731779
4.90874736650387	-0.80698432733775
4.29201229605067	-1.17032967032967
5.15110240043305	-0.688940092165895
3.63416714265307	-0.026116927700357
4.1931990470017	-0.0497216666285812
4.35360391360236	-0.256656863262293
3.48806049737295	-0.34065934065934
3.03581278884742	-0.299846244290689
4.52179030556082	-0.420917670093973
3.50789935860876	-0.205237089537095
1.30102999566398	0.0619845323713526
5.39631019918435	-0.47889759524453
4.3107558502144	-0.112232952222944
4.83880436448425	-0.256568277651638
4.16108076310237	-0.200975840732869
4.78263936534515	-1.59538259057508
3.88878700536059	-0.105111057896279
3.88189458737635	-0.373009047154365
5.3303327684261	-0.980824270177442
4.87143008924447	-0.124038117856963
3.98430306058091	-0.290672689633152
4.84518446790754	-0.233928621202074
5.04662387046206	-1.11823990283027
4.99250715474734	-0.877476388196044
4.55067981282611	-0.310919353856131
3.72875813097249	-0.160087280066558
4.22554991088347	-0.14675979371759
4.23908254820523	-0.136558353851168
3.98342989047096	-0.317199471429553
4.37463710170162	-0.172140686315279
4.13655112275381	-0.270653486774174
4.32146633786085	0.100616463720131
3.43004646465615	-0.0412736971512201
4.0534577006723	-0.288380387537923
4.07976633380207	-0.937158061932366
0.954911684825456	-0.231353935680218
4.48442428571085	-0.218819226277417
2.22836845153897	-0.171816829475794
3.66204214762503	-0.00926864526134448
4.18365919207625	-0.15593067189972
2.77174499797691	-0.0603357165737995
4.10849431676316	-0.0839341093076651
1.98530749915513	-0.208901392284556
3.66852132923121	-0.384775010954235
4.21359287338309	-0.0460032918859899
3.69487740520707	0.0323178383138769
4.73188649308438	-1.20883230774898
1.98413350340719	0.0921352941195288
3.89737484686668	-0.207843109510637
1.9054769551683	-0.179760588779832
4.91725848730943	-0.594088689507321
4.2921530394512	-0.224389604621215
3.60605936071868	-0.184538576883029
4.51089005554414	-0.3307575566487
2.43761772348605	-0.249281237547478
4.19076481779477	-0.996377783740281
4.73272857250512	-0.715388206860565
4.48730849876636	-0.292671868078976
4.63233665005963	-0.31262826611142
4.71004202996455	-0.282462686567163
3.78428644926403	0.159822542868378
4.33324720250379	-0.0731176618334717
3.10074309585265	-0.0204080307516489
5.77329675510322	-0.700750548742026
4.45186402528726	-1.19580986516471
4.78150068269761	-0.000255443501006521
1.46884672681132	1.01723796314642
3.80035092007131	-0.197423142787246
4.34261307470971	-0.0677538116814573
5.07740619817933	-0.421663290432927
4.33658950174213	-0.0145406138801428
4.95664195088021	-0.974340873758677
3.53761086457012	-0.122653915523852
2.46170724540732	-0.42574540056806
3.79458293625758	-0.163347382645347
4.09877542006625	-0.00384427177387721
4.69023488112031	-0.106888002359915
4.79029945029099	-0.102100404090845
4.97435761925929	-0.067768739476113
4.40432272959294	-0.0835703861275923
3.29893287893581	-0.05955191342607
4.35384646817547	-0.00965046413264485
4.32390940144516	-0.141902570554572
4.16417026574468	-0.165096265625422
5.2759988063966	-0.103492775446602
4.67535387062744	-0.0209455711610616
3.70460404693685	-0.0661240250561976
4.12618284558883	-0.0385954173646277
4.4704307876839	0.0184978430171339
2.30424513176894	-0.134934669869516
4.5288624216434	-0.0827721401037094
4.60523541553996	-0.109468715350123
4.5188352394939	-0.0952463053541099
3.2245931275726	-0.00202267398458587
4.80778838292966	-0.0867933437922884
4.27666140689693	-0.0517183899997232
4.32648890793145	-0.166405973115419
2	0.109480795502017
3.51267006218243	0.00316076649502129
5.16555141398287	-0.167417280344065
3.68441312249021	-0.264848343728439
2.89648136503275	0.0506616737658722
1.76431234918078	-0.0296039652244824
4.5575961450571	-0.125617702540413
3.63183108876593	-0.182617076375765
5.61232521605748	-0.119655371830432
1.55441111592891	0.0339410087880624
3.86411858764457	-0.0242769808818151
2	-0.32498462495206
4.33353083907966	-0.0618684266729827
4.50349006539481	-0.373532747096627
4.62024205803221	-0.192878443332241
5.05554720525467	-0.231549494979234
4.41041587364423	-0.0986288135920705
3.55438112675732	1.22193639862265
4.42676613859489	-0.0926923567261644
4.48991536502407	-0.188037749273571
5.16880641792018	-0.568019365242779
3.78575679996264	-0.00895215399285365
4.30883838786996	-0.116044231425323
3.14302416134027	-0.0435330750379668
4.00051511324213	-0.255550532170857
5.02433955228528	-0.240056372211815
3.6358172557808	-0.17134816557123
3.98224230545015	-0.247228089774532
3.48656392679985	-0.112251748391739
4.21179796970676	-0.0117522191546553
4.70500799984129	-0.148085819301823
[truncated: 1,037 more rows]
