# Supplementary material
Source: publisher figshare collection journal article supplement (https://plos.figshare.com/articles/dataset/_/1172034)

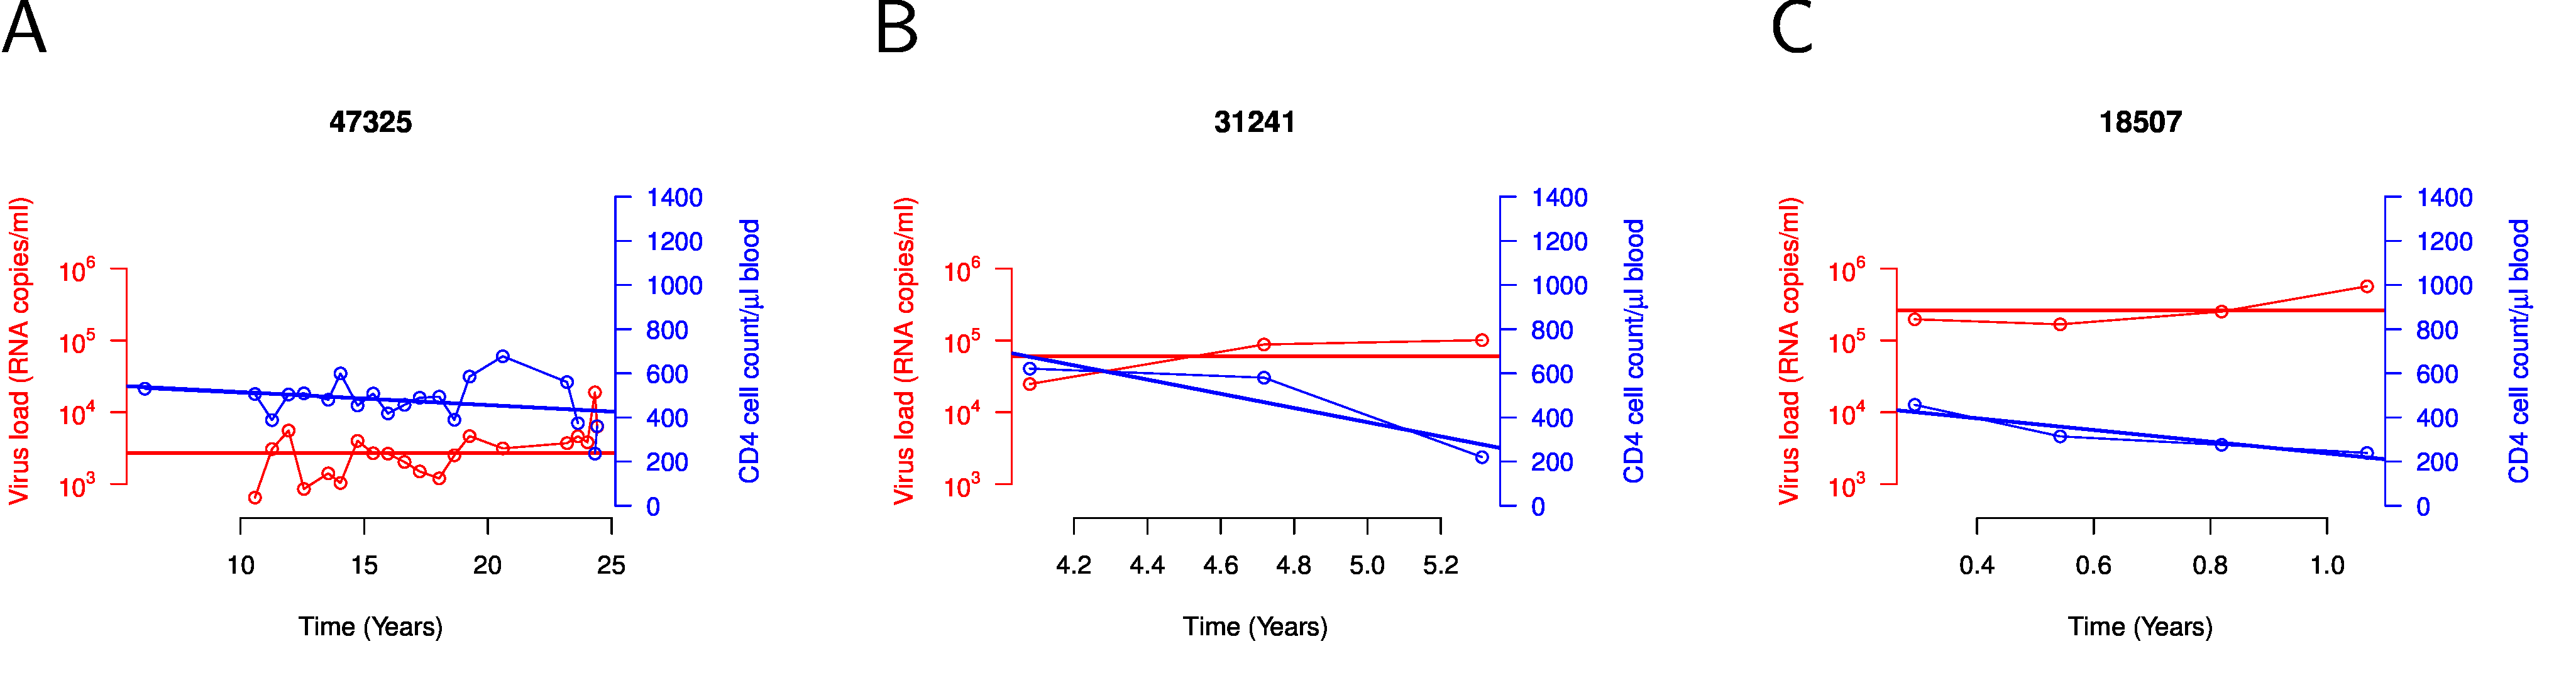

Supplement: Supplementary file 1 [file 1 › Figure S1.TIFF]

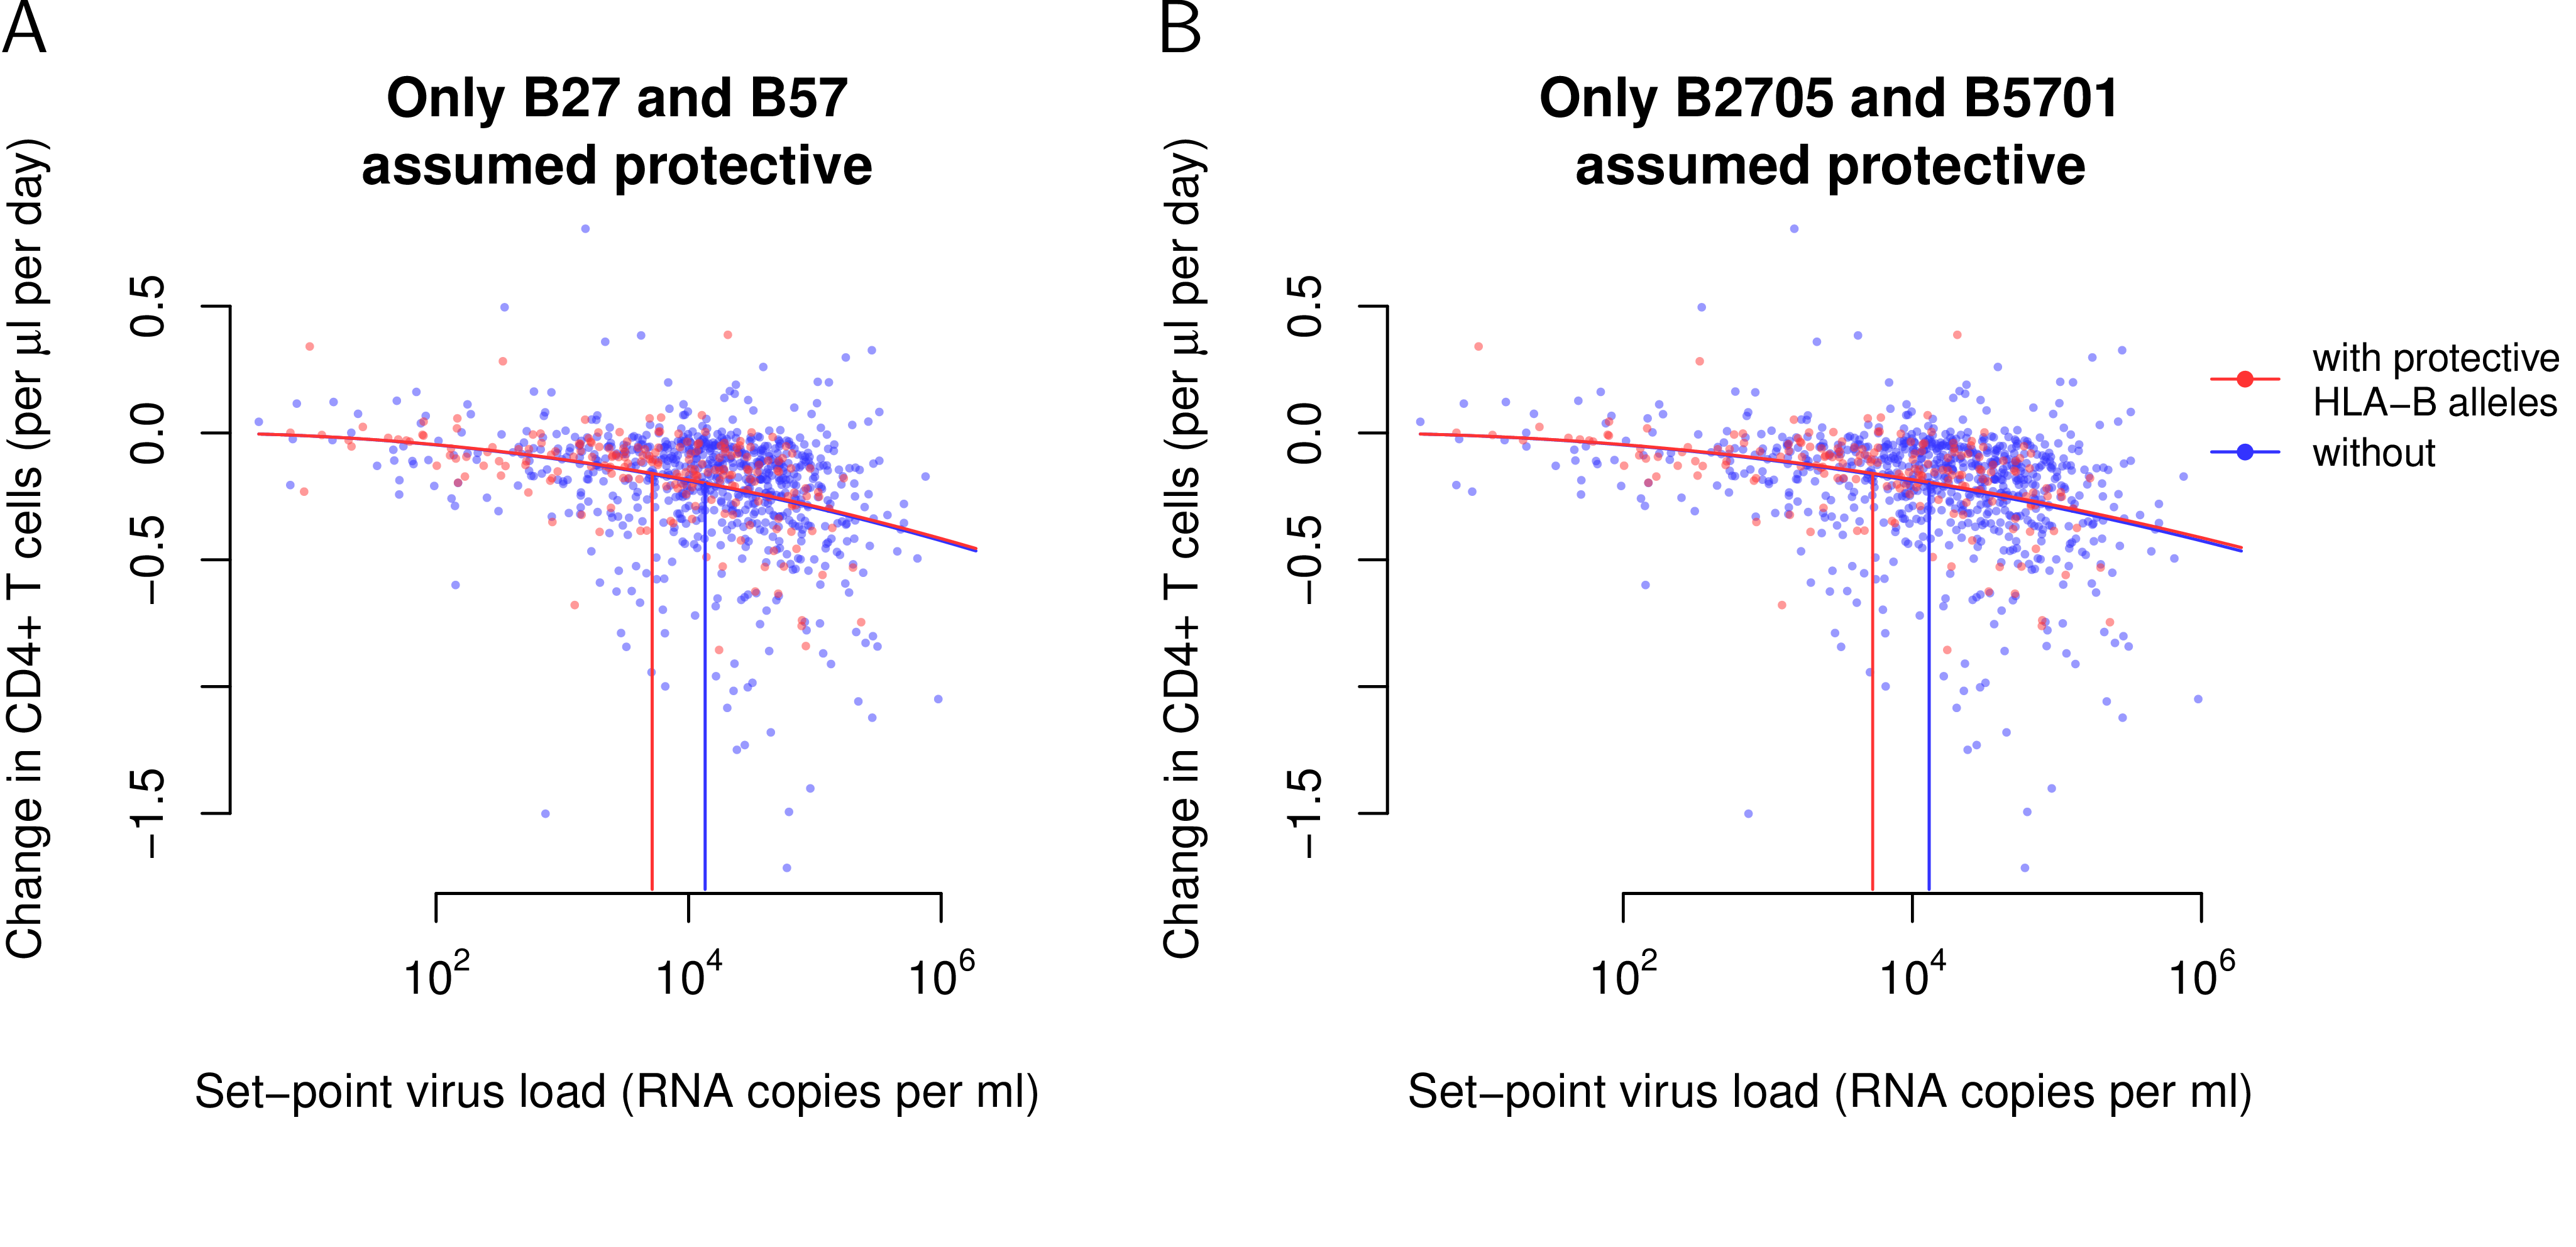

Supplement: Supplementary file 1 [file 1 › Figure S2.TIFF]

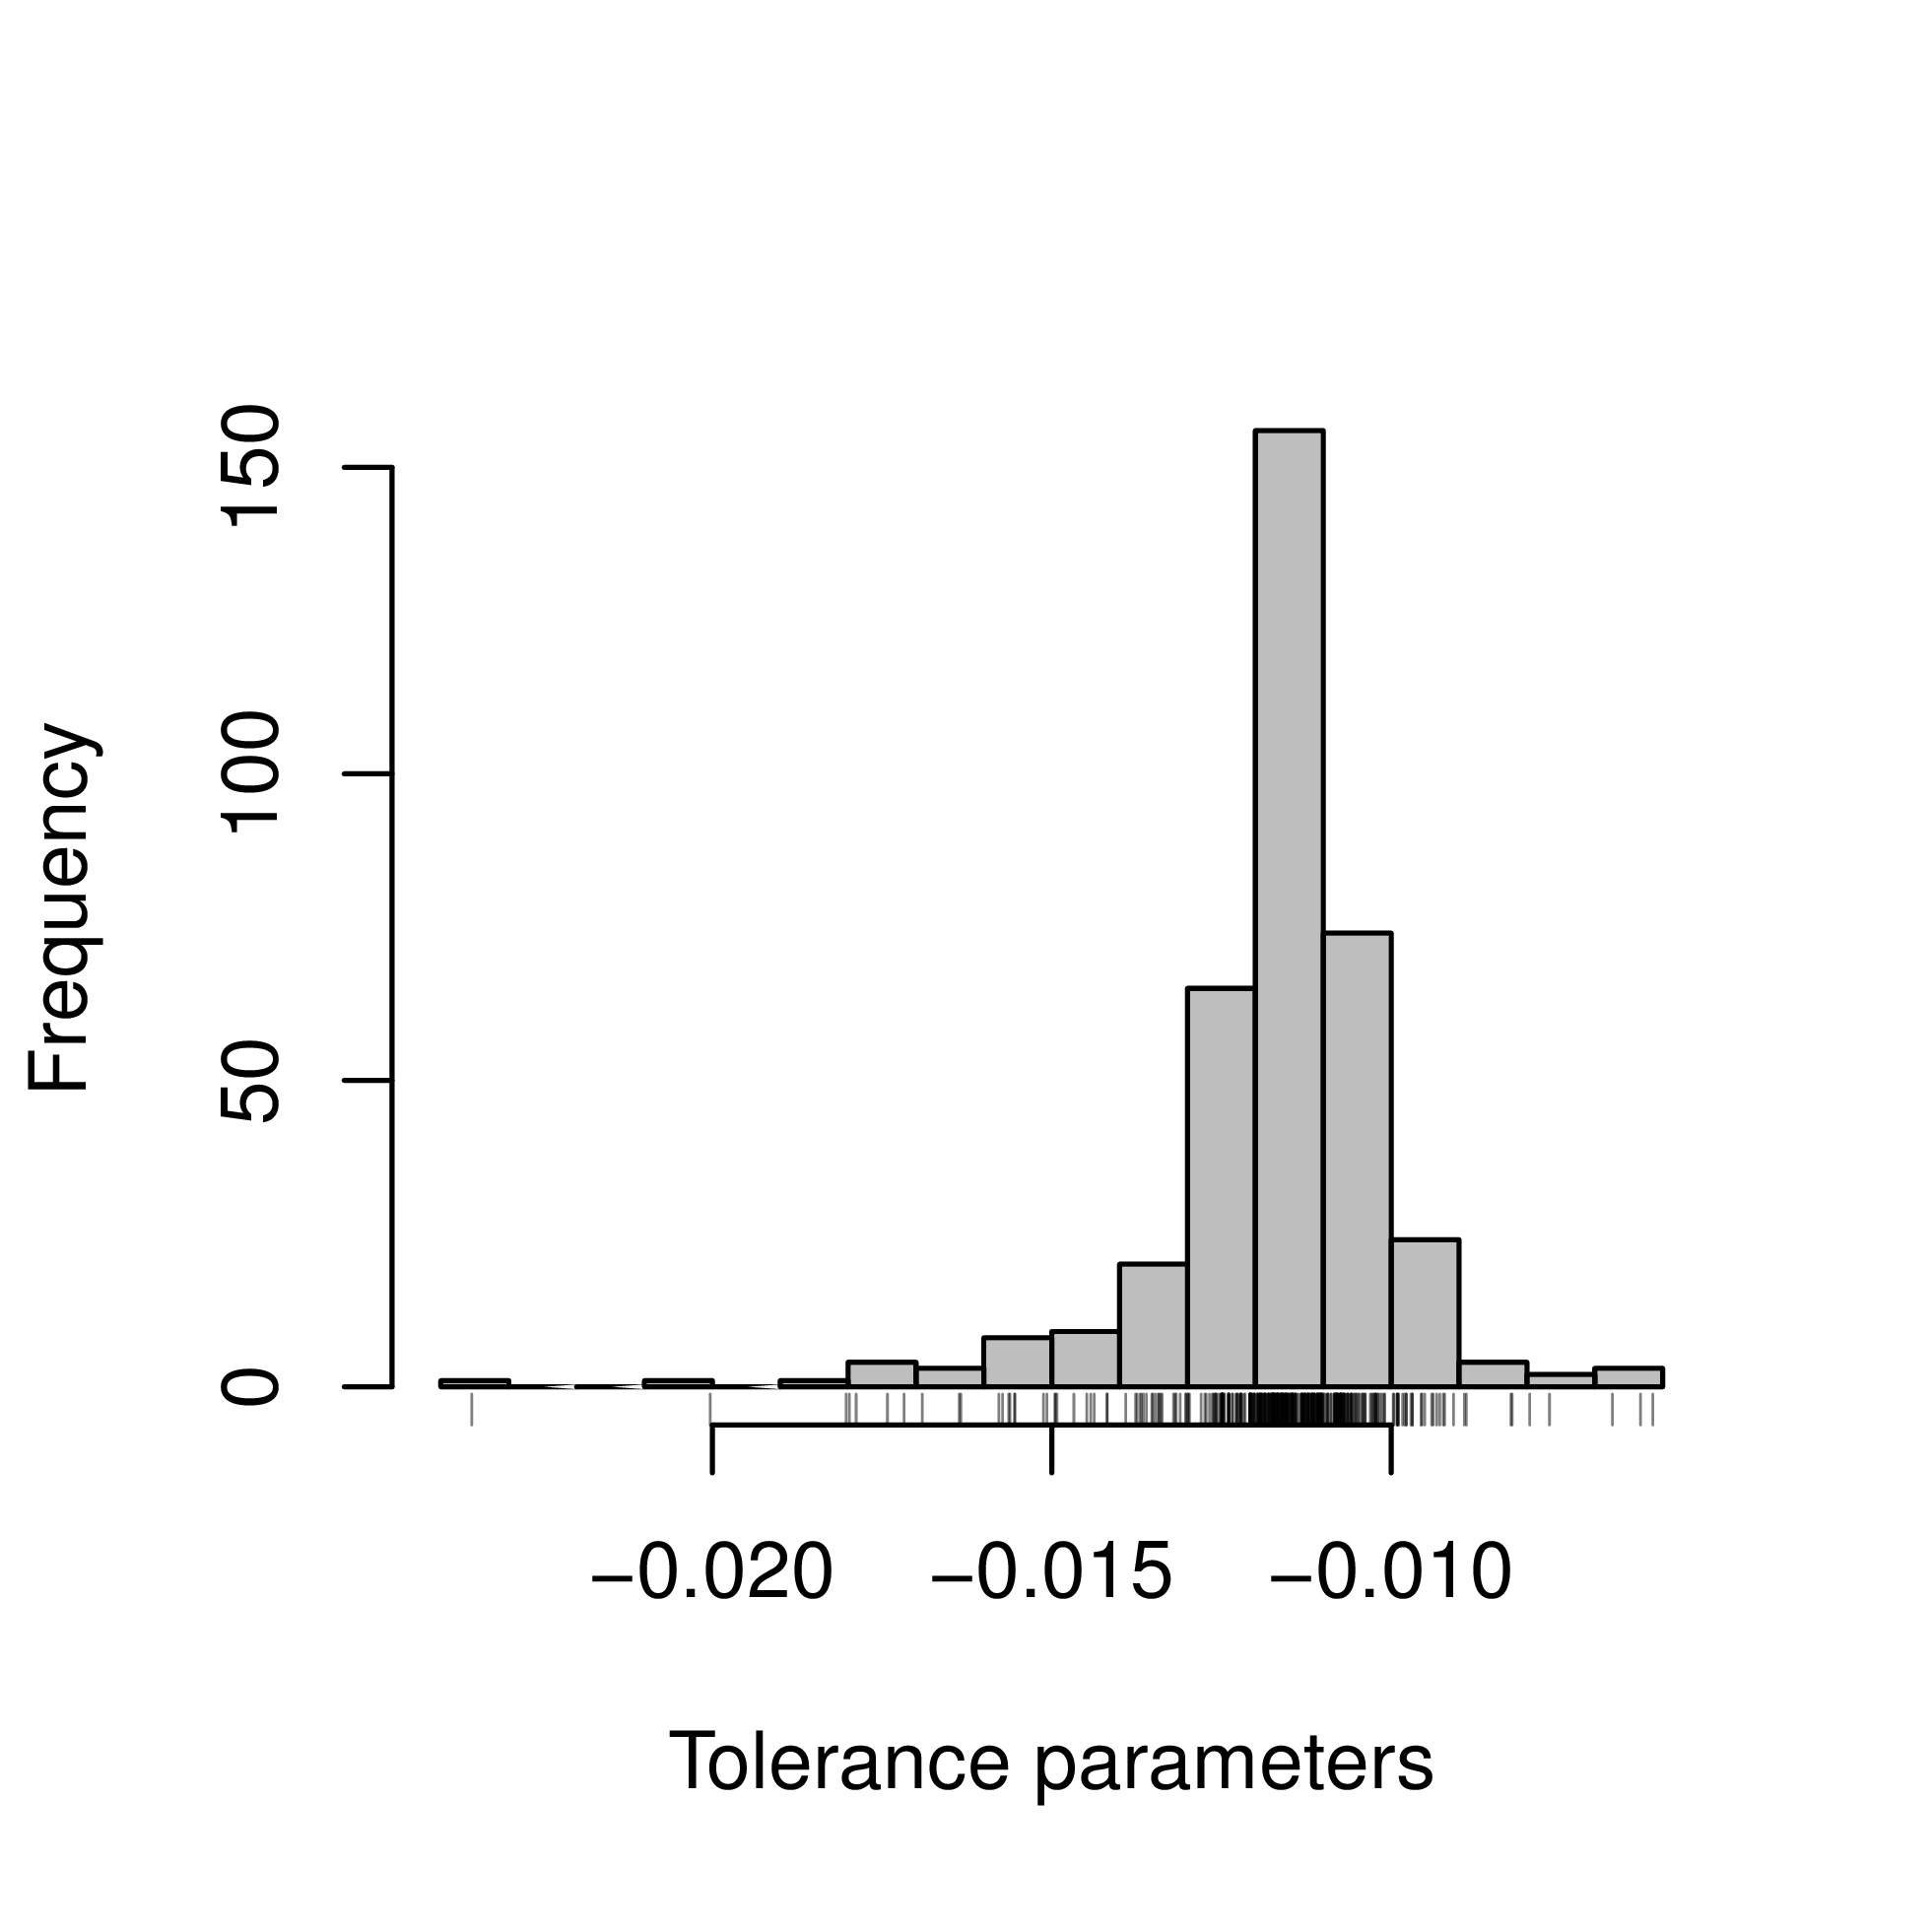

Supplement: Supplementary file 1 [file 1 › Figure S3.TIFF]

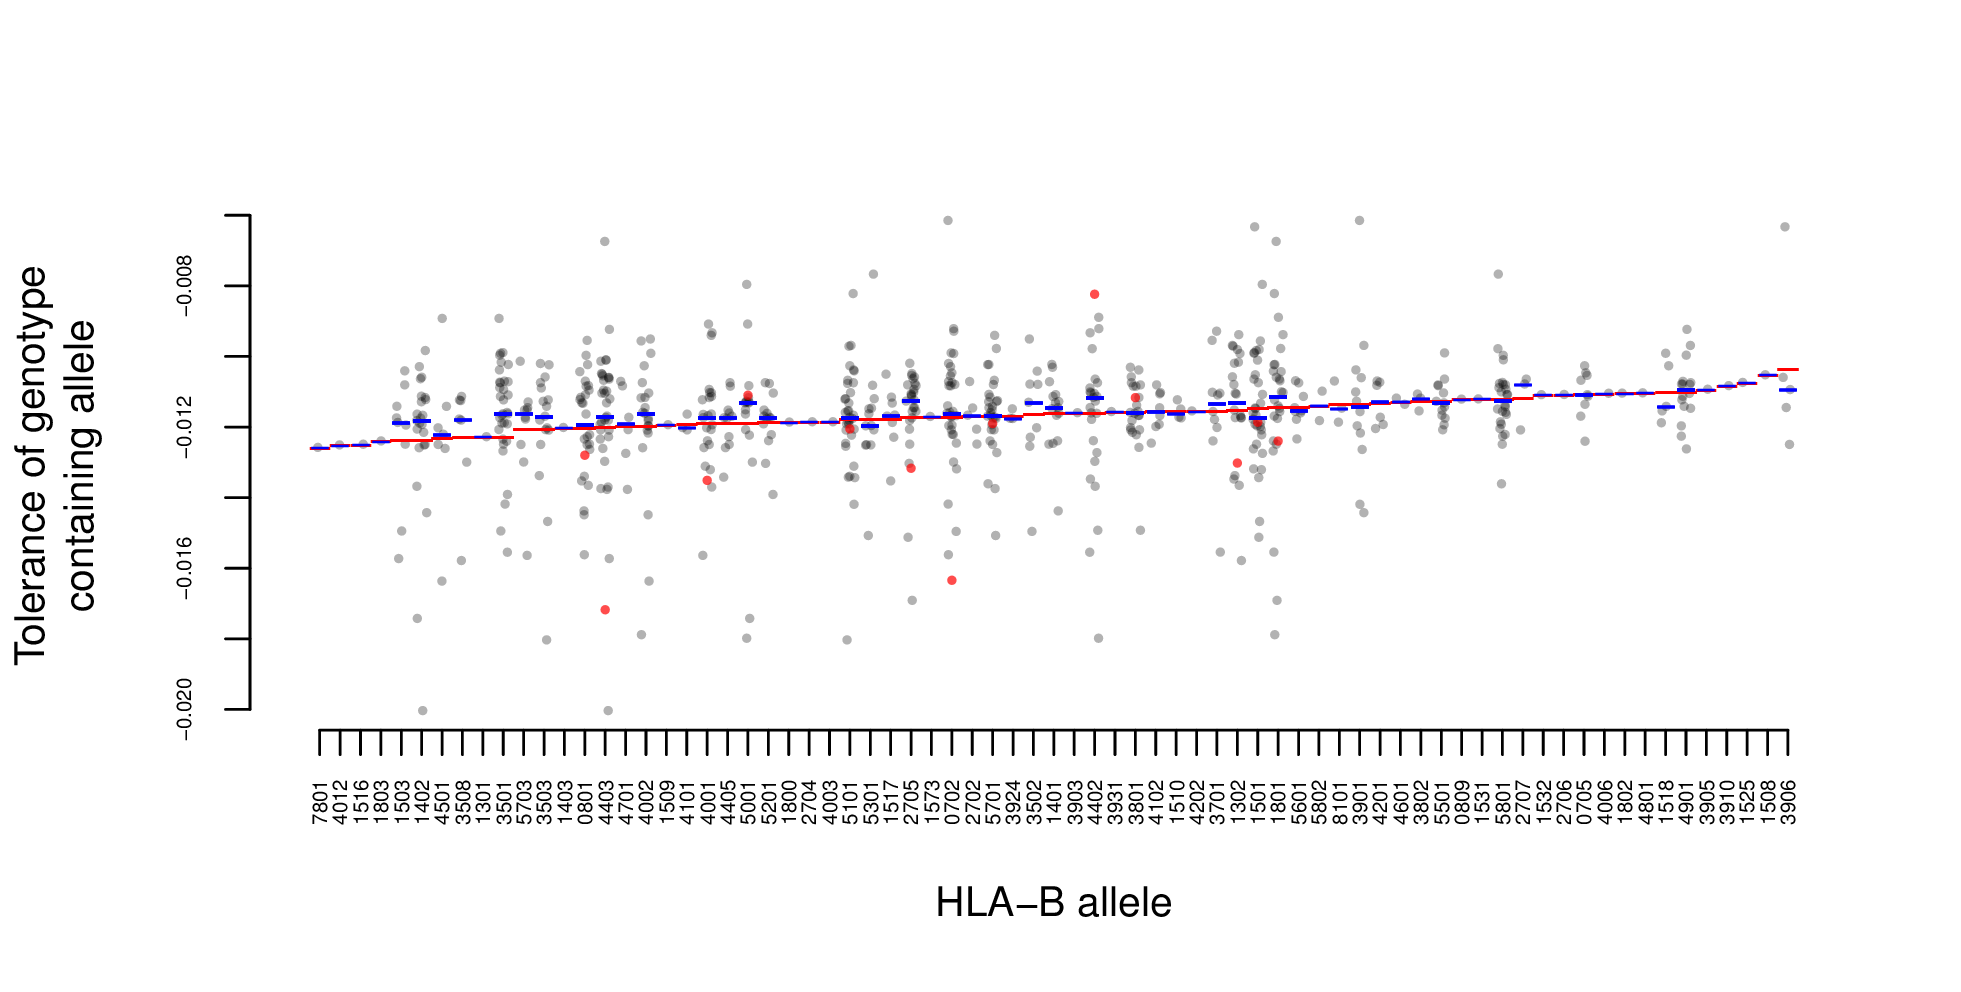

Supplement: Supplementary file 1 [file 1 › Figure S4.TIFF]

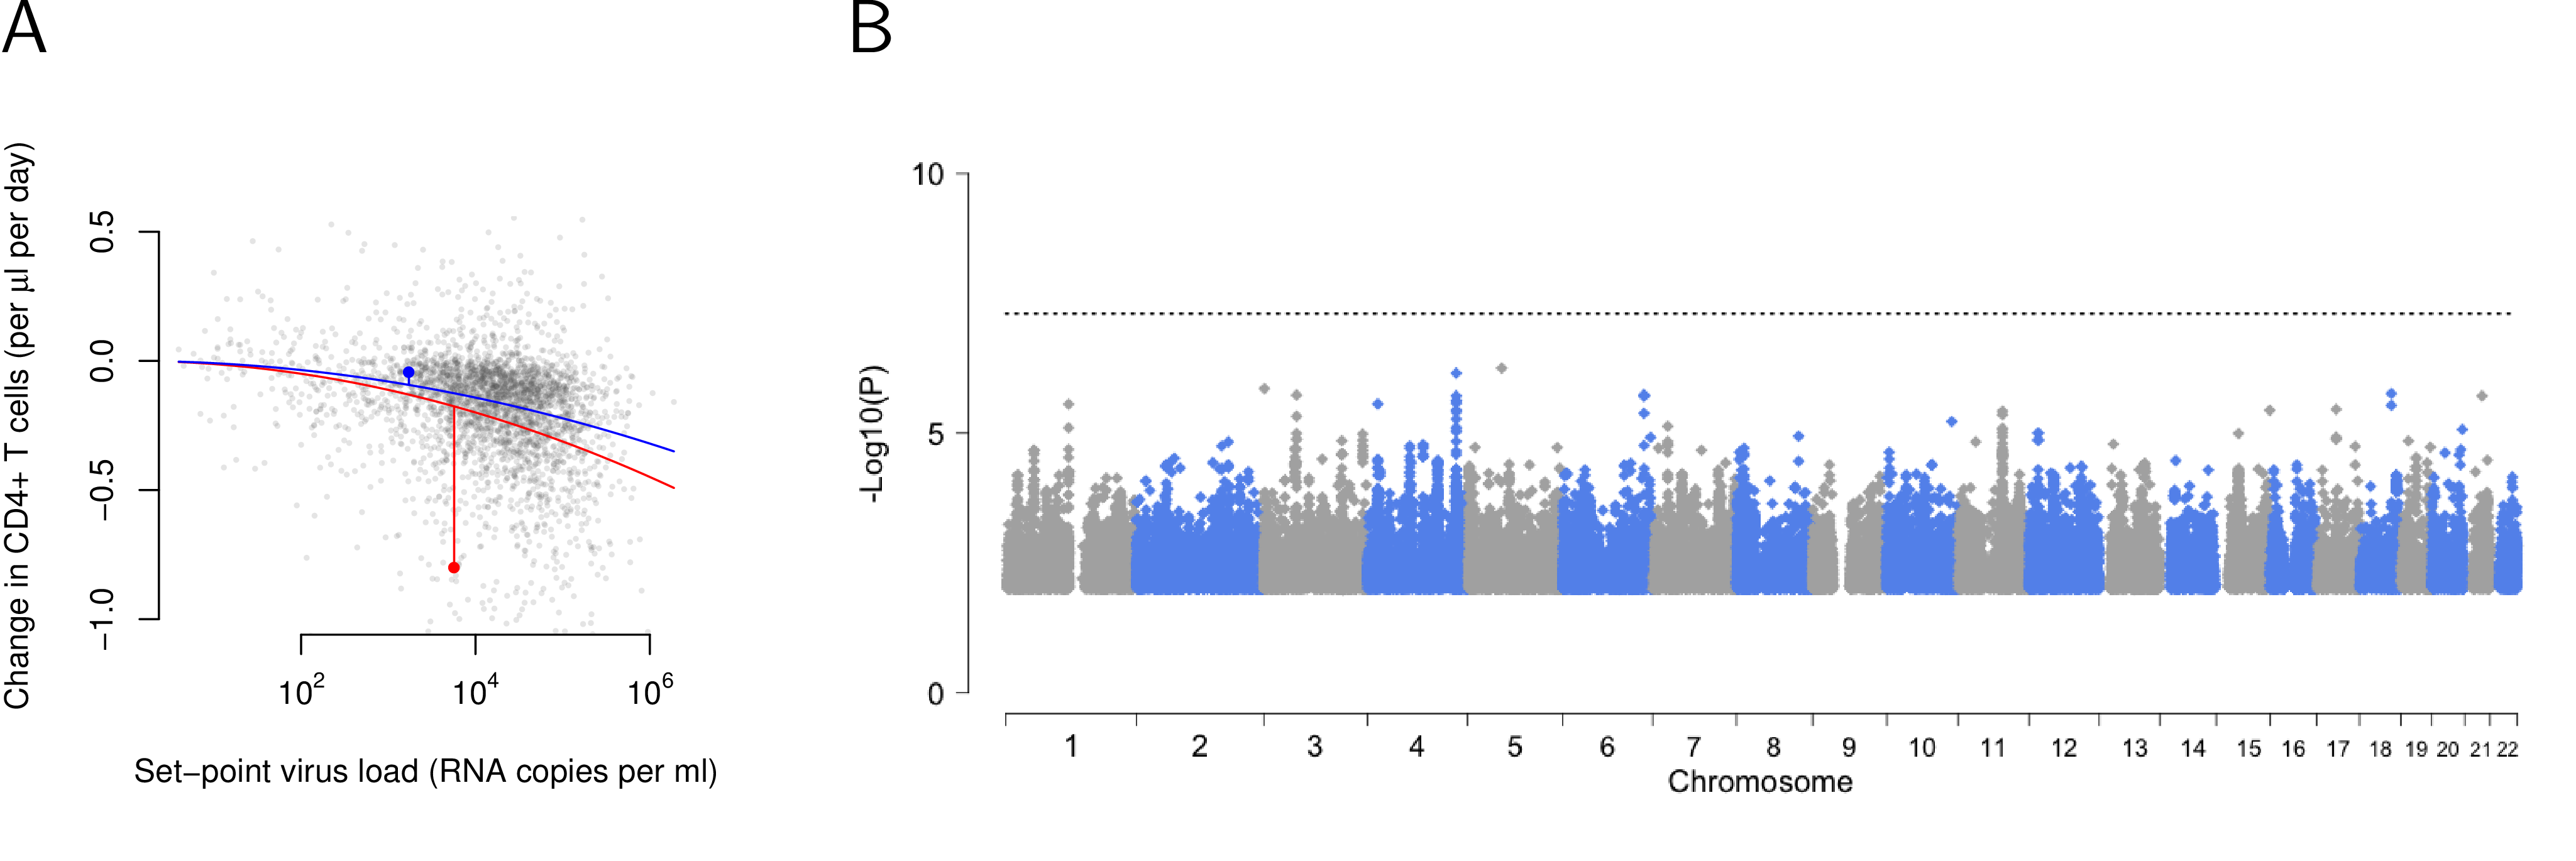

Supplement: Supplementary file 1 [file 1 › Figure S5.TIFF]
